# 1 Inter-animal variability in activity phase is constrained 2 by synaptic dynamics in an oscillatory network

3 Haroon Anwar<sup>†</sup>, Diana Martinez<sup>‡</sup>, Dirk Bucher and Farzan Nadim

4 *Federated Department of Biological Sciences, New Jersey Institute of Technology and Rutgers*  
5 *University, Newark, NJ 07102*

6 <sup>†</sup> Current Address: Center for Biomedical Imaging and Neuromodulation, Nathan Kline Institute for  
7 Psychiatric Research, Orangeburg, NY 10962

8 <sup>‡</sup> Current Address: Cooper Medical School of Rowan University, Camden, NJ 08103

9 Corresponding Author: Farzan Nadim; [farzan@njit.edu](mailto:farzan@njit.edu); (973) 596-8453

## 10 Abstract

11 The levels of voltage-gated and synaptic currents in the same neuron type can vary substantially across  
12 individuals. Yet, the phase relationships between neurons in oscillatory circuits are often maintained,  
13 even in the face of varying oscillation frequencies. We examined whether synaptic and intrinsic currents  
14 are matched to maintain constant activity phases across preparations, using the lateral pyloric (LP)  
15 neuron of the stomatogastric ganglion of the crab, *Cancer borealis*. LP produces stable oscillatory bursts  
16 upon release from inhibition, with an onset phase that is independent of oscillation frequency. We  
17 quantified the parameters that define the shape of the synaptic current inputs across preparations and  
18 found no linear correlations with voltage-gated currents. However, several synaptic parameters were  
19 correlated with oscillation period and burst onset phase, suggesting they may play a role in phase  
20 maintenance. We used the dynamic clamp to apply artificial synaptic inputs and found that those  
21 synaptic parameters correlated with phase and period were ineffective in influencing burst onset.  
22 Instead, parameters that showed the least variability across preparations had the greatest influence.  
23 Thus, parameters that influence circuit phasing are constrained across individuals, while those that have  
24 little effect simply co-vary with phase and frequency.

## 25 Introduction

26 Sensory representations and motor outputs are characterized by the relative timing between different  
27 circuit neurons, particularly during oscillatory activity (Ainsworth et al., 2012). Distinct phases of activity  
28 within each cycle are found both during oscillations associated with cognition and various behavioral  
29 states (Hasselmo et al., 2002; Hajos et al., 2004; Somogyi and Klausberger, 2005; Buzsaki and Wang,  
30 2012; Wilson et al., 2015; Buzsaki and Tingley, 2018; Dragoi, 2020), and during rhythmic motor activity,  
31 where they underlie the sequential activation of different groups of muscles (Vidal-Gadea et al., 2011;  
32 Bucher et al., 2015; Grillner and El Manira, 2015; Katz, 2016; Kiehn, 2016; Bidaye et al., 2018; Grillner  
33 and El Manira, 2020). The relative timing (phase) of a neuron's activity within each oscillation cycle is  
34 dependent on an interplay of intrinsic membrane currents and total cycle-to-cycle synaptic input (Harris-

35 Warrick, 2002; Oren et al., 2006; Marder, 2011; McDonnell and Graham, 2017; Martinez et al., 2019b).  
36 There are two confounding aspects of this interplay. First, in many oscillatory systems, phase is  
37 maintained over a range of frequencies, i.e., intrinsic and synaptic properties have to ensure that  
38 absolute timing of responses changes proportionally to the speed of rhythmic circuit activity (Grillner,  
39 2006; Mullins et al., 2011; Zhang et al., 2014; Le Gal et al., 2017; Martinez et al., 2019b). Second, phase  
40 can be very similar across individual animals despite substantial variability in the individual ionic and  
41 synaptic currents (Bucher et al., 2005a; Marder and Goaillard, 2006; Calabrese et al., 2011; Marder,  
42 2011; Roffman et al., 2012; Golowasch, 2014; Hamood and Marder, 2014; Marder et al., 2014a;  
43 Calabrese et al., 2016).

44 The phenomenon that circuit activity is maintained despite substantial variability in underlying  
45 conductances has been explored most thoroughly in invertebrate central pattern generators, including  
46 those of the crustacean stomatogastric ganglion (STG). In these circuits, the timing of neural activity is  
47 critically dependent on voltage-gated ion channels (Harris-Warrick et al., 1995b; Harris-Warrick et al.,  
48 1995a; Kloppenburg et al., 1999). However, such voltage-gated conductances and the associated ion  
49 channel expression show substantial inter-individual variability (Liu et al., 1998; Golowasch et al., 2002;  
50 Marder and Goaillard, 2006; Schulz et al., 2006; Marder, 2011; Hamood and Marder, 2014; Marder et  
51 al., 2014a), raising the question how activity can be so similar across preparations. A possible  
52 explanation is suggested by the finding that voltage-gated conductances do not vary independently, but  
53 in a cell type-specific correlated manner (Khorkova and Golowasch, 2007; Schulz et al., 2007; Ransdell et  
54 al., 2012; Temporal et al., 2012; Tran et al., 2019). Theoretical work suggests that homeostatic,  
55 compensatory tuning explains correlation of expression levels of different ion channels (Prinz et al.,  
56 2004a; O'Leary et al., 2013; O'Leary et al., 2014; Franci et al., 2020), and there is some experimental  
57 evidence that co-regulation of voltage-gated conductances can have compensatory function to preserve  
58 circuit activity (MacLean et al., 2003; MacLean et al., 2005; Ransdell et al., 2012; Zhao and Golowasch,  
59 2012; Ransdell et al., 2013; Santin and Schulz, 2019).

60 Synaptic currents also vary substantially across individuals and their magnitude is correlated with  
61 relative timing of the postsynaptic neuron (Goaillard et al., 2009). In theoretical work, the magnitude of  
62 synaptic currents has been varied and tuned alongside voltage-gated conductances to show which  
63 combinations and possible mechanisms give rise to similar activity (Prinz et al., 2004a; O'Leary et al.,  
64 2014), and it has been suggested that the relative synaptic strengths must be different in individual  
65 animals to produce observed activity phases (Gunay et al., 2019). However, it is unknown whether  
66 synaptic currents co-vary with individual voltage-gated currents in a correlated manner to compensate  
67 for variability in intrinsic neuronal excitability. Furthermore, the effect of synaptic input on rhythmic  
68 patterns is not just dependent on synaptic strength, but also on timing, duration, and details of the  
69 temporal trajectory of the synaptic current (Prinz et al., 2003; Martinez et al., 2019b).

70 We examine how synaptic inputs contribute to phase constancy under normal biological conditions in  
71 the face of variability across individuals. For this, we use the identified lateral pyloric (LP) neuron in the  
72 STG, a follower neuron of the triphasic oscillatory pyloric circuit, which has a single copy in each animal.  
73 We examine the variability of synaptic input to the LP neuron across animals and compare that with its  
74 activity phase. We examine correlations among synaptic parameters and between these parameters and

75 intrinsic voltage-gated currents of the LP neuron. We then use the dynamic clamp technique to explore  
76 how synaptic parameters influence the activity phase of the LP neuron.

## 77 Results

### 78 Variability of phase

79 The goal of this study was to identify mechanisms that allow a follower pyloric neuron to maintain  
80 constant activity phase across preparations, despite considerable variability in cycle period, synaptic  
81 input, and voltage-gated conductances. We chose the LP neuron to explore these mechanisms, because  
82 it exists as a single copy and is readily identifiable. The LP neuron does not have intrinsic oscillatory  
83 activity but receives periodic inhibitory synaptic input from the pacemaker neurons AB and PD, and the  
84 follower PY neurons. In each cycle, it rebounds from inhibition to produce a burst of action potentials  
85 (Figure 1A).

86 The triphasic pyloric activity pattern was continuously present in all preparations, with the temporal  
87 sequence of each PD burst being followed after some delay by the LP burst, and then the PY burst  
88 (Figure 1A). To quantify the variability in phase and its consistency across different cycle periods ( $P$ ), we  
89 measured the latencies of the LP neuron burst onset ( $LP_{on}$ ) and termination ( $LP_{off}$ ) across 28  
90 preparations, from at least 30 s of pyloric activity in each. All latencies were measured with respect to  
91 the burst onset of the pacemaker group PD neurons. We also kept track of the burst end phase ( $PD_{off}$ ) of  
92 the PD neurons, to quantify the degree to which the pacemakers maintain a constant duty cycle (Abbott  
93 et al., 1991). We did not quantify the PY neuron burst onset and end phases, because in *C. borealis*, they  
94 are virtually identical to  $LP_{off}$  of the same cycle, and  $PD_{on}$  of the subsequent cycle (Goaillard et al., 2009).  
95 First, we determined the mean values for latencies,  $P$ , and phases ( $\varphi = \text{latency}/P$ ) in each preparation.  
96 Across preparations,  $P$  ranged from 423 to 2038 ms, with a mean of 880 ms ( $\pm$  368 SD). As reported  
97 previously (Bucher et al., 2005a; Goaillard et al., 2009), the latency values of  $PD_{off}$ ,  $LP_{on}$  and  $LP_{off}$   
98 increased roughly proportionally with  $P$  (Figure 1B). Consequently, phases did not change significantly  
99 with  $P$  (Figure 1C).

100 It is noteworthy that a lack of correlation with  $P$  does not mean that phases were completely invariant,  
101 as the histograms in Figure 1C indicate. We compared the variability of mean phases and  $P$  across  
102 preparations with the cycle-to-cycle variability observed across individual preparations. Figure 1D shows  
103 box plots of coefficients of variation (CVs) within individual preparations, alongside the single CV values  
104 calculated from the means across preparations. Variations in phase were in the same range within and  
105 across preparations. In contrast, there was a much larger variability of mean  $P$  across preparations than  
106 within each preparation. These results confirm that phases are under much tighter control across  
107 preparations than cycle period.

**Figure 1. Pyloric activity phases are variable but not correlated with the cycle period.**

**A.** Left: schematic diagram shows the layout of the STNS in vitro and the locations of intracellular (electrode) and extracellular (circles) recordings. OG: esophageal ganglion, CoG: commissural ganglion, STG: stomatogastric ganglion, lvn: the lateral ventricular nerve, pdn: pyloric dilator nerve, pyn: pyloric nerve. Middle: schematic diagram shows a simplified circuit diagram of the neurons recorded. Ball-and-stick symbols are inhibitory chemical synapses. Resistor denotes electrical coupling. Right: simultaneous extracellular and intracellular recordings show the regular triphasic oscillations of the pyloric circuit. Shown are bursting activity of pacemaker neuron PD and follower neurons LP and PY. Cycle period ( $P$ ) and latencies of the onset and end of each burst (arrows) are calculated from the onset of the PD burst. Extracellular recordings are from the lvn (showing the LP, PD and PY spikes), the pdn (showing the PD spikes) and pyn (showing the PY and LPG spikes). Intracellular recording from the LP neuron

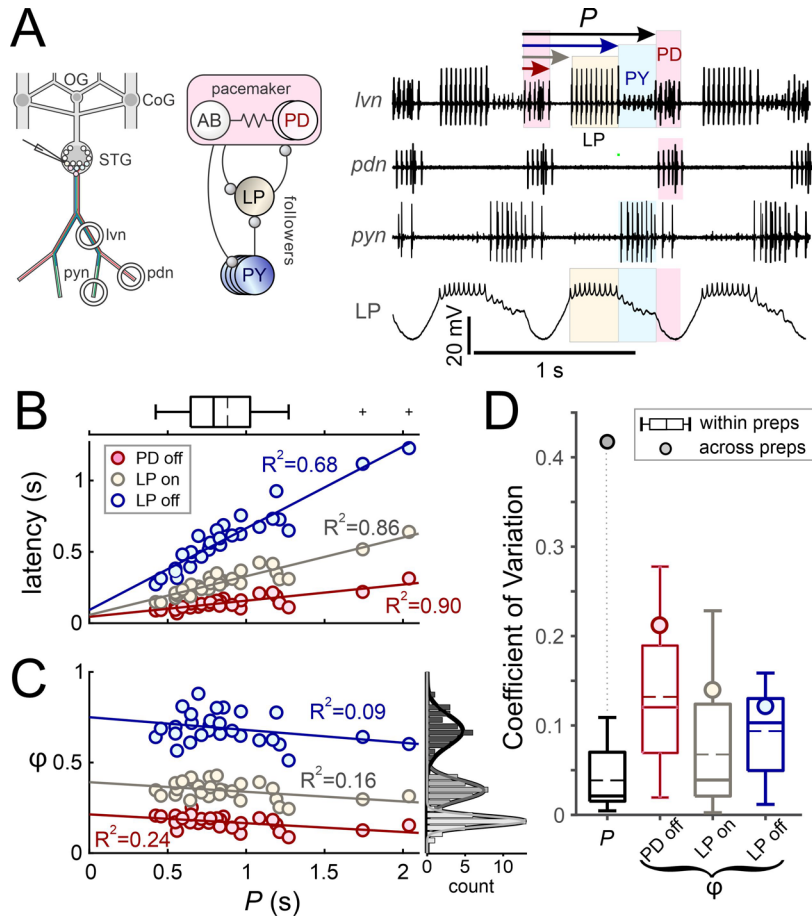

shows bursting activity (blue) and slow wave oscillations, as well as timing of IPSPs from the PY (green) and PD (pink) neurons. **B.** Burst latencies of the PD and LP neuron in reference to PD burst onset, as marked in panel A, shown vs.  $P$ . Quartile plot shows the distribution of  $P$ , with the dashed line indicating the mean value. Lines indicate best linear fit, showing that latencies grow proportionally with  $P$ . **C.** Phase values ( $\phi = \text{latency} / P$ ) shown vs.  $P$ . Histograms show distribution of  $\phi$  values. Linear fits indicate a lack of correlation between all  $\phi$  values and  $P$ . **D.** Coefficient of variation of  $P$  and  $\phi$  values shown to compare variability of the values within preparations (quartile plots) to their variability across preparations (circles).

## 108 Inter-individual variability of voltage-gated currents and synaptic inputs

109 The maximal conductances ( $g_{\max}$ ) of voltage-gated ionic (henceforth called intrinsic) currents in  
 110 identified pyloric neurons, including LP, show large variability across animals (Marder and Goaillard,  
 111 2006; Schulz et al., 2006; Goaillard et al., 2009; Marder, 2011; Golowasch, 2014; Marder et al., 2014a).  
 112 Variability of  $g_{\max}$  is well correlated with variability in transcript levels of the underlying ion channel  
 113 genes, and therefore serves as a good proxy for variability of ion channel numbers (Schulz et al., 2006).

114 We measured intrinsic currents in LP for two reasons. First, variability has previously only been  
 115 determined for  $g_{\max}$ , and we wanted to also examine the variability of voltage-dependence. Second, we  
 116 measured synaptic currents in the same preparations to establish if there was co-variation that could  
 117 indicate compensatory regulation of intrinsic and synaptic currents. We performed these measurements  
 118 of synaptic and intrinsic currents during ongoing rhythmic pyloric activity, restricting ourselves to the  
 119 subset of intrinsic currents that under these conditions can be measured without pharmacological  
 120 manipulation (Zhao and Golowasch, 2012). They included the high-threshold voltage-gated  $K^+$  current

121 ( $I_{HTK}$ ), the transient  $K^+$  current ( $I_A$ ), and the hyperpolarization-activated inward current ( $I_H$ ) (Figure 2A).  
 122 Currents were converted to conductance values, and for  $K^+$  currents, the activation curves in each  
 123 individual preparation were fit with a sigmoid to determine  $g_{max}$ , voltage of half activation ( $V_{1/2}$ ), and the  
 124 slope factor ( $k$ ) (Figure 2B). For  $I_{HTK}$ , we obtained these parameters for both the transient ( $I_{HTKt}$ ) and the  
 125 persistent ( $I_{HTKp}$ ) components.

**Figure 2. Parameters defining voltage-gated currents  $I_{HTK}$ ,  $I_A$  and  $I_H$  show considerable variability. A.** Example voltage clamp recordings of high-threshold potassium currents ( $I_{HTK}$ , **A1**; arrows indicate the transient [t] and persistent [p] components), the transient potassium A current ( $I_A$ , **A2**) and the H current ( $I_H$ , **A3**). Double-arrow in A3 indicates the measured amplitude of  $I_H$ . **B.** Schematic diagram of fits in each experiment to the  $I_{HTK}$  and  $I_A$  conductances ( $g$ , measured by dividing current by the driving force, assuming  $E_K = -80$  mV). Fits were used to calculate maximum conductance ( $g_{max}$ ), half-activation voltage ( $V_{1/2}$ ) and activation slope factor ( $k$ , measured from the slope of the dashed line). **C.** Maximal conductances of the transient and persistent components of  $I_{HTK}$ ,  $I_A$  and  $I_H$  across preparations. **D.** Half activation voltage of the transient and persistent components of  $I_{HTK}$  and of  $I_A$  across preparations. **E.** Activation slope factor of the transient and persistent components of  $I_{HTK}$  and of  $I_A$  across preparations.

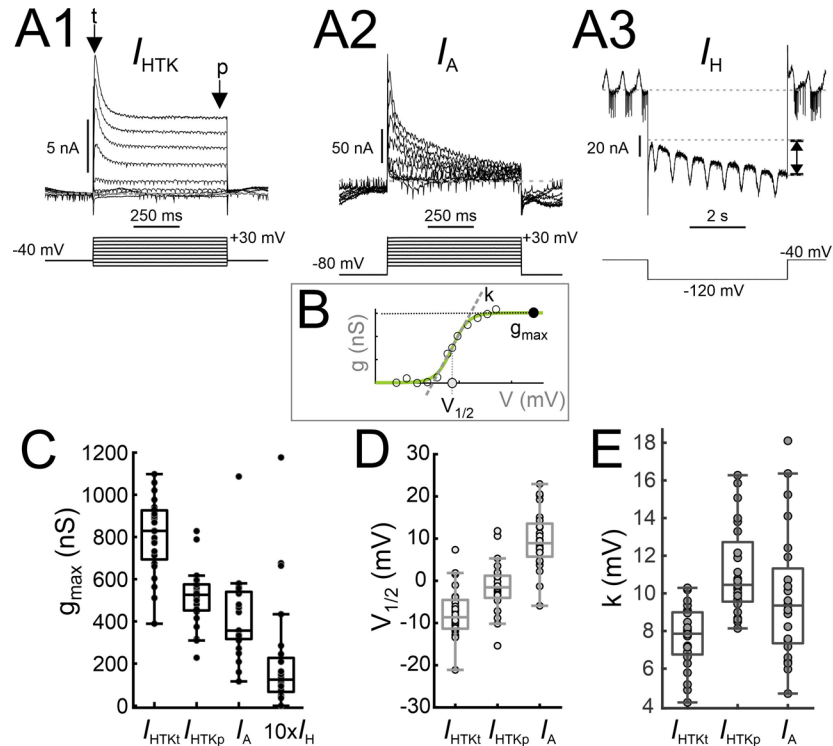

126

127 Like previous reports (Schulz et al., 2006; Khorkova and Golowasch, 2007),  $g_{max}$  values of  $I_{HTK}$ ,  $I_A$ , and  $I_H$   
 128 showed large variability (Figure 2C). In addition, we found that for both  $I_{HTK}$  and  $I_A$ , the parameters  $V_{1/2}$   
 129 and  $k$  were also subject to large variability (Figure 2D-E). We interpret this as an indication that not only  
 130 the number of channels, but also their gating properties can vary substantially across individuals.

131 To examine variability of synaptic inputs across preparations, we recorded the LP neuron's graded  
 132 inhibitory postsynaptic currents (IPSCs) in response to PD and PY neuron input during ongoing pyloric  
 133 activity (Figure 3A). The shape of the recorded IPSCs varied considerably across preparations. We used  
 134 12 parameters to quantify the IPSC characteristics (Figure 3B; see Methods). The distributions of these  
 135 parameters showed that the IPSC in the LP neuron varies greatly across preparations (Figure 3C and  
 136 Table S1).

**Figure 3. Parameters that define the synaptic input show considerable variability.**

**A.** Total current measured in the LP neuron voltage clamped at a holding potential of -50 mV during the ongoing pyloric rhythm. The pyloric rhythm is recorded extracellularly (*lvn*), indicating the timing of the LP, PY and PD neuron bursts. LP action potentials escape the voltage clamp and can be seen in the current and extracellular recordings (pale yellow). The portion of the current outside this range is due to synaptic input (downward arrows) from the PY (light blue) and pacemaker (PD, pink) neurons. The gray curve is the current low-pass filtered (<20 Hz). **B1.** The synaptic waveform shape (gray curve) during a single cycle of oscillation is approximated by a piecewise-linear curve (black curve), marked by five time points ( $t_0-t_4$ ) denoting the borders of the colored regions in panel A. The time range of the IPSC and the amplitudes of the synaptic currents due to the pacemaker neurons ( $I_{syn-PD}$ ), due to the PY neurons ( $I_{syn-PY}$ ), and the sum of the two ( $I_{syn-tot}$ ) are marked. **B2.** The piecewise-linear curve of B1 shown in phase (time/period). This normalized curve is used to define the parameters of synaptic input to the LP neuron. For definitions, please refer to the main text. Five primary parameters (in red) are chosen for further analysis. **C.** The inter-individual variability of different synaptic parameters, including current amplitudes (**C1**), slopes (**C2**), peak phases (**C3**) and duty cycles (**C4**).

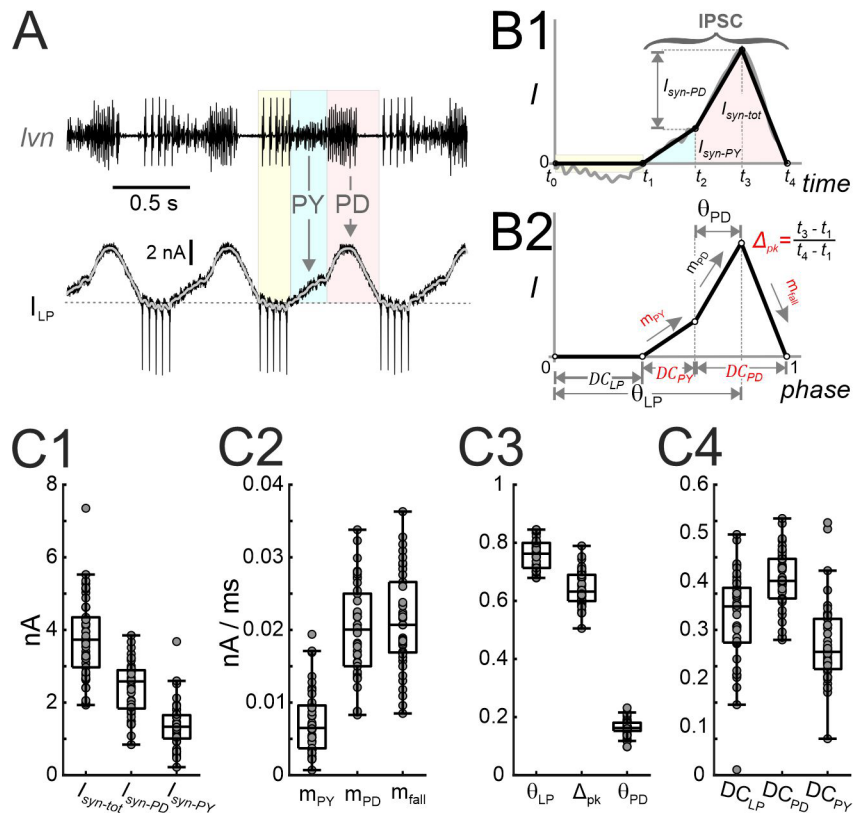

137

138 The latency of the LP burst onset relative to the pacemakers is shaped by the interaction between its  
 139 intrinsic voltage-gated ionic currents and the synaptic input that it receives. Notably, hyperpolarization  
 140 during inhibition de-inactivates  $I_A$  and activates  $I_H$  (Harris-Warrick et al., 1995b; Harris-Warrick et al.,  
 141 1995a). This plays an important role in controlling the timing of the burst onset, because  $I_H$  increases the  
 142 strength of the rebound burst and advances its onset, while  $I_A$  delays it (MacLean et al., 2005). The  
 143 activation levels of  $I_H$  and  $I_A$  in each cycle depend on the strength, duration, and history of the inhibition.  
 144 In addition,  $\varphi_{LP\ on}$  is sensitive to changes in both magnitude and temporal trajectory of synaptic inputs  
 145 (Goaillard et al., 2009; Martinez et al., 2019b). We hypothesized that the synaptic inputs to the LP  
 146 neuron may covary in a compensatory fashion with its intrinsic properties, thus resulting in a relatively  
 147 constrained activity phase across animals. We therefore examined the extent to which the synaptic  
 148 input parameters may be coregulated with  $g_{max}$  of these ionic currents, as well as  $I_{HTK}$ . We also tested for  
 149 any correlations of synaptic parameters with  $V_{1/2}$  and  $k$  values of the  $K^+$  currents. We did not find any  
 150 significant pairwise linear correlations between any of the synaptic and intrinsic current parameters  
 151 (Figure 4 and Table S2; all P values in linear regression analysis > 0.05; N = 19).

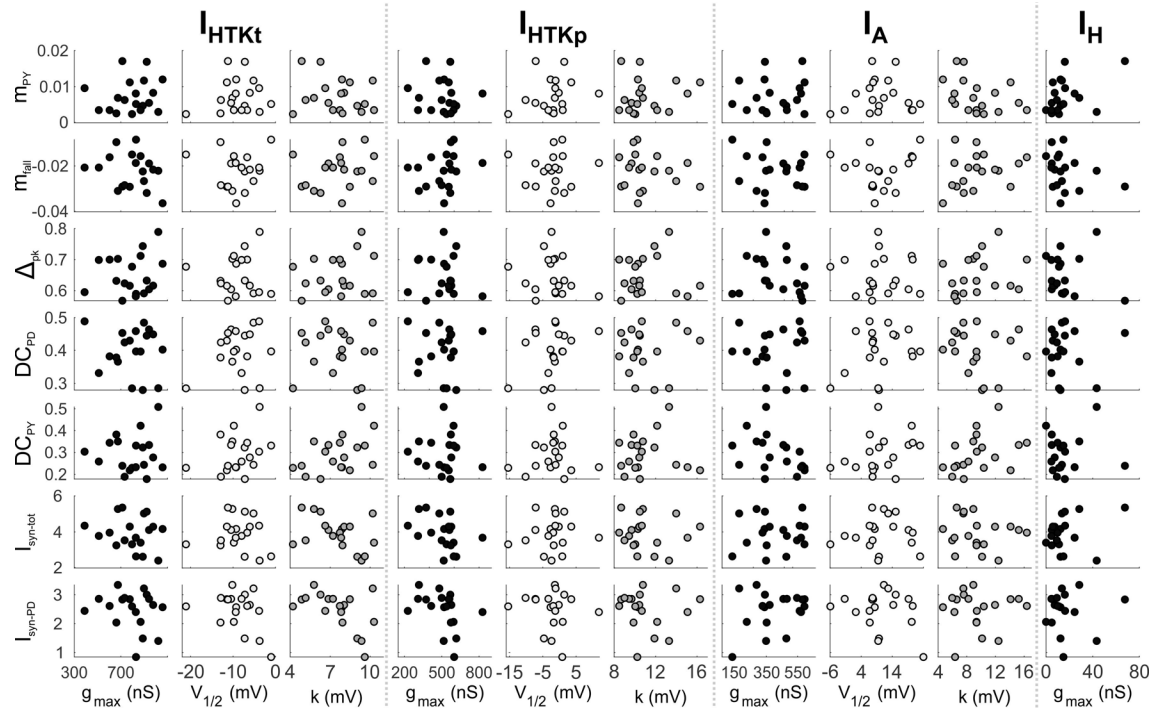

**Figure 4.** There are no pairwise linear correlations between any of the synaptic parameters and parameters of the voltage-gated ionic currents.

#### 152 The LP burst onset is influenced by synaptic parameters

153 Our results suggest that the consistency of phase across individuals and its independence of cycle period  
 154 do not simply arise from pairwise correlations between synaptic and intrinsic parameters. We therefore  
 155 asked if individual synaptic or intrinsic current parameters are good candidates for playing a substantial  
 156 role in controlling phase. To this end, we made use of the variability of mean  $P$  and the limited variability  
 157 of mean  $\varphi_{LP\ on}$  across individuals and performed correlational analyses. For synaptic currents, we  
 158 included the maximum IPSC amplitude and the amplitude of the pacemaker IPSC, as these are  
 159 commonly used synaptic parameters. Otherwise, we restricted the analysis to the non-redundant set of  
 160 parameters. As described in the Methods, the 5 non-redundant parameters are the subset of measures  
 161 that are sufficient to describe synaptic current trajectory and can theoretically vary independently of  
 162 each other.

163 First, we tested whether variability of current parameters was correlated with  $P$ . We found that a subset  
 164 of the parameters describing the trajectory of synaptic currents, but none of the intrinsic parameters,  
 165 showed correlations with  $P$  (Figure 5). The IPSC slope parameters  $m_{PY}$  and  $m_{fall}$  were strongly correlated  
 166 with  $P$ , but in opposite directions.  $DC_{PD}$  also showed a weak (negative) correlation with  $P$ . The latter is  
 167 somewhat surprising, as we found a negative trend but no correlation between  $\varphi_{PD\ off}$  and  $P$  in the  
 168 pyloric pattern analysis shown in Figure 1C.

169 Next, we explored whether  $\varphi_{LP\ on}$  was correlated with any of the current parameters (Figure 6). Once  
 170 again, we found correlations with a subset of the parameters describing the trajectory of synaptic  
 171 currents, but none with intrinsic parameters.  $\varphi_{LP\ on}$  was weakly positively correlated with  $m_{PY}$ , and  
 172 strongly negatively correlated with  $\Delta_{pk}$ . Interestingly,  $\varphi_{LP\ on}$  was correlated strongly with both  $DC_{PD}$  and

173  $DC_{PY}$ , with opposite signs. This suggests that synaptic inputs from both the pacemakers and the PY  
 174 neurons may influence  $\varphi_{LP\ on}$ , even though the input from the PY neurons is primarily responsible for the  
 175 termination of the LP neuron burst, not its onset (Marder and Bucher, 2007). In comparison with Figure  
 176 5,  $m_{PY}$  and  $DC_{PD}$  were correlated with both  $\varphi_{LP\ on}$  and  $P$ , whereas  $m_{fall}$  was only correlated with  $P$ , and  $\Delta_{pk}$   
 177 and  $DC_{PY}$  only with  $\varphi_{LP\ on}$ .

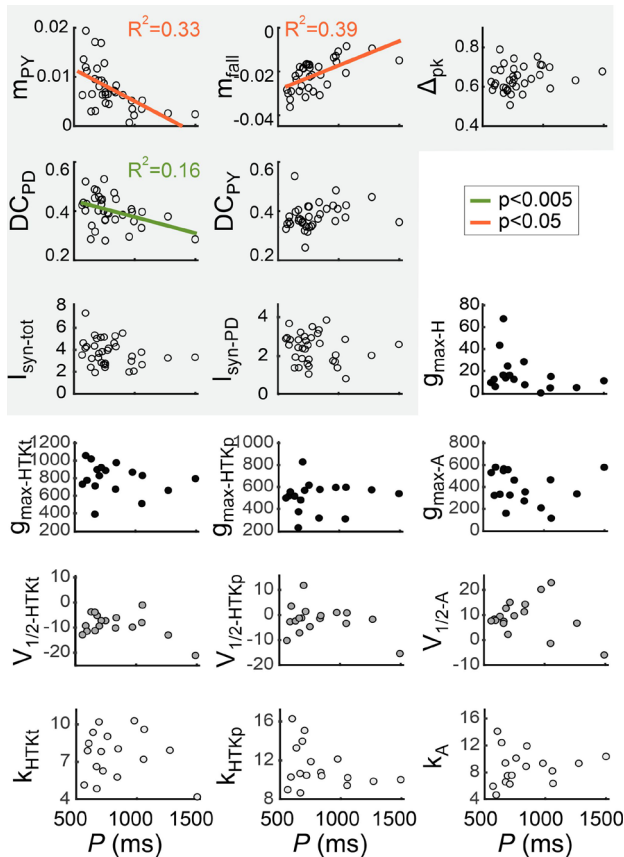

**Figure 5. A subset of the LP neuron synaptic, but not intrinsic, parameters are correlated with the pyloric cycle period.** The five primary synaptic parameters, the amplitudes of the total and pacemaker-component of the synaptic current, and the intrinsic current parameters are compared with the pyloric cycle period ( $P$ ) across preparations. Three synaptic parameters, but no intrinsic parameter, covary with  $P$ . The synaptic parameters are highlighted.

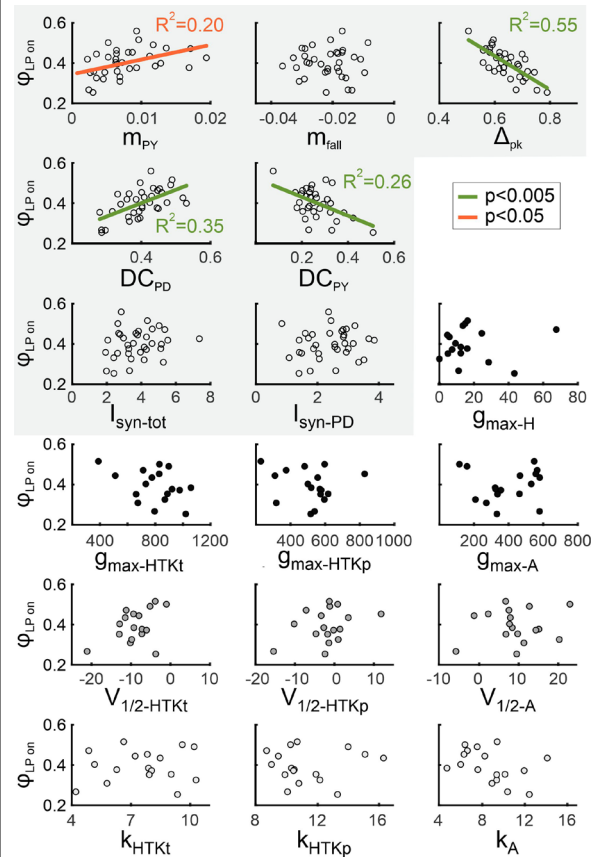

**Figure 6. The LP neuron burst onset phase is correlated with multiple synaptic, but not intrinsic, parameters.** The LP burst onset phase ( $\varphi_{LP\ on}$ ) is compared with the five primary synaptic parameters, the amplitudes of the total and pacemaker-component of the synaptic current, and the intrinsic current parameters across preparations.  $\varphi_{LP\ on}$  covaries with four synaptic parameters, but not with intrinsic parameters. The synaptic parameters are highlighted.

### 178 The influence of synaptic parameter variation on the LP neuron's burst onset

179 Given that our results revealed no correlations between single intrinsic current parameters and  $\varphi_{LP\ on}$ ,  
 180 but correlations between  $\varphi_{LP\ on}$  and several synaptic parameters, we further explored which aspects of  
 181 the overall synaptic current trajectory were important. Because we found no correlations between  
 182 synaptic current amplitudes and  $\varphi_{LP\ on}$  or  $P$ , we restricted the analysis to the non-redundant parameters.  
 183 As stated above, these 5 parameters can theoretically be varied independently to change synaptic  
 184 current trajectory. However, this does not mean that they actually varied independently in the



185 measured experimental data. Indeed, we found that most parameter pairs were correlated, some  
186 strongly and others weakly (Figure 7A). In particular,  $\Delta_{pk}$  and  $DC_{PD}$  were strongly correlated, as was  
187 expected for parameters that quantify the contribution of the pacemakers. However,  $m_{fall}$ , which also  
188 depends on the strength and the timing of the pacemaker inputs, was not correlated with  $\Delta_{pk}$  or  $DC_{PD}$ .  
189 Surprisingly though,  $m_{fall}$  was strongly correlated with  $m_{PY}$  and, consistent with this fact,  $\Delta_{pk}$  and  $DC_{PD}$   
190 were also correlated with  $m_{PY}$ .

191 Our correlational analysis indicates that multiple synaptic parameters co-vary across experiments. The  
192 correlation of multiple synaptic parameters with  $\varphi_{LP\ on}$  (as seen in Figure 6) indicates that these five  
193 parameters in fact covary across preparations and therefore the variation in synaptic shape occurs in a  
194 lower dimensional parameter space. To address this issue, it is possible to simplify the correlational  
195 analysis by determining which combination of parameters explains the observed variability in  $\varphi_{LP\ on}$ . To  
196 reduce the dimensionality of the IPSC parameter space, we performed principal component analysis  
197 (PCA). We found that 95% of the total variability of IPSC parameters were explained by the first three  
198 PCs (PC1: 55.2%; PC2: 22.8%; PC3: 16.5%). Figure 7B shows all synaptic waveforms in the plane of the  
199 first two PCs, as only PC1 and PC2 were significantly correlated with  $\varphi_{LP\ on}$  (PC1:  $p < 0.001$ ; PC2:  $p = 0.013$ ;  
200 Figure 7C). Interestingly, both PC1 and PC2 (and only these) were also significantly correlated with  $P$   
201 (PC1:  $p < 0.001$ ; PC2:  $p = 0.024$ ; Figure 7D).

202 To examine whether the coordinated variation of synaptic parameters in the direction of PC1 was  
203 sufficient to explain phase maintenance, we used the linear regression fit equations of PC1 vs.  $\varphi_{LP\ on}$  and  
204 PC1 vs.  $P$  (left panels of Figure 7C-D) to predict a linear relationship between  $\varphi_{LP\ on}$  and  $P$ . In Figure 7E,  
205 we compare this prediction (black line) with the data for LP on over  $P$  shown in Figure 1C (open circles).  
206 This comparison produced a coefficient of determination of  $R^2 = 0.10$ , which was comparable with the  
207 linear fit obtained in Figure 1C ( $R^2 = 0.16$  for  $\varphi_{LP\ on}$ ). This indicates that variation of the synaptic  
208 conductance trajectory with  $P$  along PC1 is sufficient to remove the correlation between  $\varphi_{LP\ on}$  and  $P$ ,  
209 thus predicting phase maintenance across preparations. Additionally correcting this prediction by adding  
210 the linear regression fit equations of PC2 (right panels of Figure 7C-D) did not greatly change this  
211 prediction (violet line in Figure 7E,  $R^2 = 0.08$ ).

212 Our analysis of data obtained during spontaneous pyloric rhythmic activity revealed combinations of  
213 synaptic parameters whose coordinated variation could potentially result in relatively constant  $\varphi_{LP\ on}$   
214 across preparations, despite variation in  $P$ . However, there are two caveats. First, correlation may result  
215 from causation in some cases, but not in others. A synaptic parameter (or a principal component, such  
216 as PC1) that is correlated with  $\varphi_{LP\ on}$  may in fact causally influence  $\varphi_{LP\ on}$ . If so, the system must adjust  
217 this parameter at different cycle periods in order to produce phase maintenance. For example, this  
218 could explain why PC1 is correlated with both  $\varphi_{LP\ on}$  and  $P$ . In contrast, a parameter may simply change  
219 with  $\varphi_{LP\ on}$  but not influence it, in which case its change with  $P$  would not contribute to phase  
220 maintenance. Similarly, a parameter such as  $\Delta_{pk}$  that is correlated with  $\varphi_{LP\ on}$  but not  $P$  may also causally  
221 influence  $\varphi_{LP\ on}$  (see, e.g., Martinez et al., 2019b) and would therefore be kept constant across animals in  
222 order to maintain phase. Second, causation may not necessarily reveal itself as a correlation. In our data,  
223  $\varphi_{LP\ on}$  (and all other pyloric phases) varied in a fairly limited range, independent of the large variability of  
224  $P$ . Therefore, simply analyzing correlations in data obtained from spontaneous rhythms constrained the

225 maximum effect a synaptic parameter may have on  $\varphi_{LP\ on}$  to the same limits. Within these limits, a  
 226 parameter that has no correlation with  $P$  or  $\varphi_{LP\ on}$  may in fact have a strong influence on  $\varphi_{LP\ on}$  and, for  
 227 this reason, be kept constant across animals (and thus show no correlation with  $P$ ).

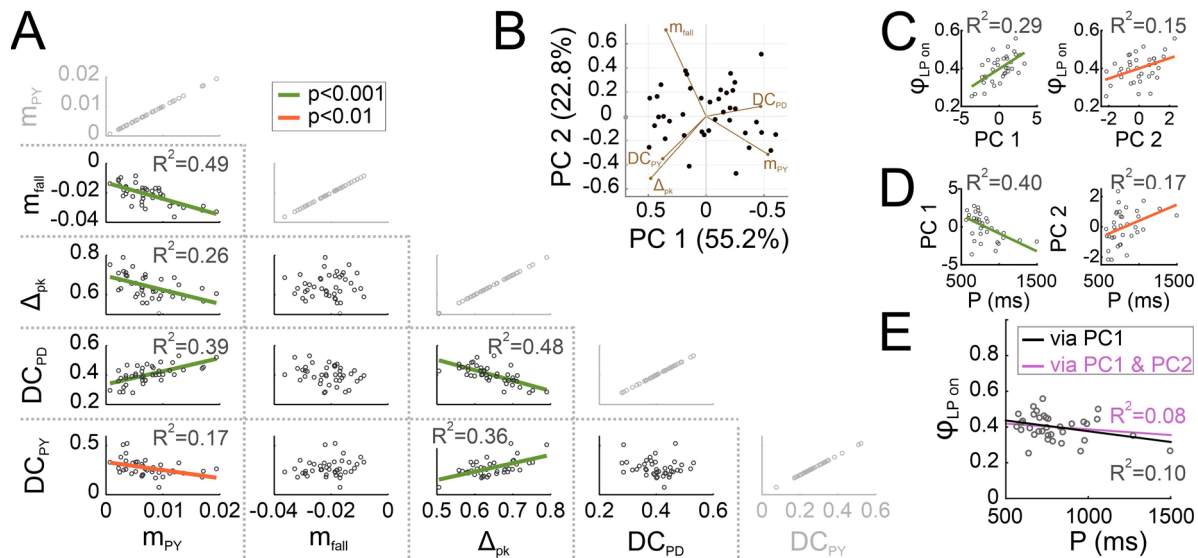

**Figure 7. The primary synaptic parameters are correlated.** **A.** The five primary synaptic parameters were compared pairwise across preparations. Of the 10 non-trivial comparisons (shown in black), 6 showed significant correlations. The trivial comparisons (gray) are shown for clarity. **B.** Principal component analysis was used to find directions of largest variability among the five synaptic parameters. The first two principal components described 78% of the variability in synaptic parameters. Filled circles show all recorded synaptic waveforms, projected down to the PC1-PC2 plane. Percentages on axis labels indicate the extent of variability in the direction of the PC. The directions of the five primary synaptic parameters in the PC1-PC2 plane are indicated by brown line segments. **C.** Across preparations, the LP burst onset phase ( $\varphi_{LP}$ ) is correlated with both PC1 and PC2 (but not PC3, PC4 or PC5). **D.** Across preparations, both PC1 and PC2 (but not PC3, PC4 or PC5) are correlated with the pyloric cycle period ( $P$ ). **E.** Using the PC1 and PC2 correlations with  $\varphi_{LP}$  and  $P$  (lines in left graphs of panels C and D) to calculate a linear relationship (black line) between  $\varphi_{LP}$  and  $P$  correctly predicts a lack of correlation between these two factors. Including both the PC1 and PC2 correlations (all lines in panels C and D) to do the linear prediction (magenta line) does not greatly improve the prediction.

228

229 For these reasons, establishing a causal influence of synaptic parameters on  $\varphi_{LP\ on}$  requires  
 230 experimentally controlling and systematically varying them. To this end, we performed a set of  
 231 experiments in which the LP neuron was synaptically isolated, and synaptic conductance waveforms  
 232 were artificially applied using the dynamic clamp technique. Conductance trajectories were constructed  
 233 to resemble the current trajectories and adhering to the same decomposition into parameters shown in  
 234 Figure 3B. We kept the cycle period constant at 1 s and injected the waveforms periodically until the LP  
 235 burst activity attained a steady state ( $\sim 30$  cycles; Figure 8A). In each experiment, this procedure was  
 236 repeated with 80 different synaptic trajectories in randomized order (Figure 8B). Because our focus here  
 237 is on variability and activity phase, we did not do a complete analysis of these dynamic clamp  
 238 experiments on LP activity and only considered the effect on the LP neuron's burst onset at steady state,  
 239 measured as the latency from the end of the artificial synaptic input (inset of Figure 8A; also see  
 240 Methods).

**Figure 8. Using dynamic clamp to inject a periodic synaptic conductance waveform into the synaptically-isolated LP neuron to measure the latency of LP burst onset.** **A.** A pre-determined conductance waveform (one of 80) is injected into the synaptically-isolated LP neuron as an inhibitory synapse for 30 cycles at a cycle period of 1 s. The latency of the LP burst onset, measured from the end of the conductance waveform (long vertical dashed line in inset), reaches a steady state value after several cycles. Inset shows the last cycle. **B.** 80 synaptic conductance waveforms were used periodic dynamic clamp injection in each LP neuron, as described in A. **C.** An example analysis of the sensitivity of LP burst onset latency to changes in synaptic waveform shape along PC3, while PC1 remains constant (but other PCs vary freely). **C1.** The 80 synaptic waveforms (black circles) used in dynamic clamp experiments were sorted by projecting the shape down to the PC3-PC1 plane. Pairs of waveforms (red circles) that fell along horizontal lines of constant PC1 (and were apart by at least 0.05 in PC3 units) were chosen for sensitivity analysis. Inset above the figure shows the waveform shapes for the gray filled circles.

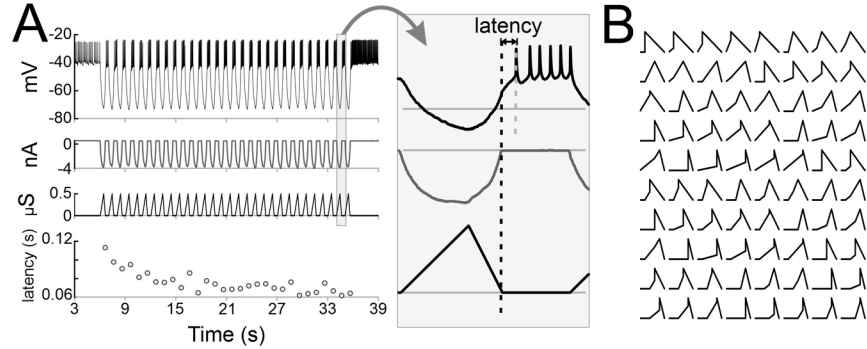

**C2.** Example responses of the LP neuron to dynamic clamp injection of synaptic conductance waveforms marked by the yellow stars in A1. **C3.** The change in LP burst latency (see A) as a function of the change in PC3 value (in bins of 0.1), averaged across constant PC1. The slope of this change ( $\Delta\text{latency} / \Delta\text{PC}$ ) is used as a measure of sensitivity. **D.** Same as C, but changing the waveform along PC1 while keeping PC2 constant.

**D1.** The 80 synaptic waveforms (black circles) used in dynamic clamp experiments were sorted by projecting the shape down to the PC3-PC1 plane. Pairs of waveforms (red circles) that fell along horizontal lines of constant PC1 (and were apart by at least 0.05 in PC3 units) were chosen for sensitivity analysis. Inset above the figure shows the waveform shapes for the gray filled circles.

**D2.** Example responses of the LP neuron to dynamic clamp injection of synaptic conductance waveforms marked by the yellow stars in A1. **D3.** The change in LP burst latency (see A) as a function of the change in PC3 value (in bins of 0.1), averaged across constant PC1. The slope of this change ( $\Delta\text{latency} / \Delta\text{PC}$ ) is used as a measure of sensitivity. **D.** Same as C, but changing the waveform along PC1 while keeping PC2 constant.

241

242 The correlations obtained from the principal component analysis imply that varying synaptic waveform  
 243 along PC1 while retaining the respective correlations with  $P$  and  $\varphi_{\text{LP on}}$  shown in Figure 7C-D should keep  
 244  $\varphi_{\text{LP on}}$  independent of  $P$ , which would be sufficient to describe phase constancy across preparations. We  
 245 used our dynamic clamp data to examine whether changing the synaptic waveform along PC1 in fact  
 246 influenced the LP burst onset latency. To do so, we first described our 80 synaptic waveforms in terms of  
 247 PC1-PC5. Because visualization of 5D space is difficult, if not impossible, we show the waveform shapes

248 projected down to the PC1-PC2 and PC1-PC3 planes (Figures 8C1 and 8D1, respectively). To analyze the  
249 effect of changing the synaptic shape in the direction of each PC, we first measured the sensitivity of the  
250 LP burst onset latency to changing that PC, while keeping another PC constant (see Methods). We did  
251 this analysis for each pair of PCs. Two examples are shown in Figures 8C and 8D. Surprisingly, the LP  
252 burst onset latency showed little sensitivity when the synaptic waveform was changed along PC1 while  
253 keeping PC2 constant (example in Figure 8C2; average effects in Figure 8C3; 1-way ANOVA:  $p=0.26$  and  
254  $F=1.32$ ). In contrast, changing the synaptic waveform along PC3 while keeping PC1 constant produced a  
255 very large decrease the burst onset latency (example in Figure 8D2; averages in Figure 8D3; 1-way  
256 ANOVA:  $p<0.001$  and  $F=8.21$  using). This result is surprising because it implies that changing the synaptic  
257 waveform along PC1 does not result in any change in the LP burst onset, which contradicts our initial  
258 interpretation of the correlations observed in Figure 7C-D. If changing the synaptic waveform along PC1  
259 does not produce any change in the LP burst onset, then it makes no sense to claim that the mechanism  
260 for phase constancy across preparations with different cycle periods is by changing the synaptic  
261 waveform along PC1. Similarly, the synaptic waveforms showed no correlation between PC3 and either  
262  $P$  or  $\varphi_{LP\ on}$ . Yet, experimentally changing the synaptic waveform along PC3 produces a large effect on the  
263 LP burst onset.

264 In Figure 9, we summarize the statistics of the effect of changing the synaptic waveform (with dynamic  
265 clamp) along each PC, while keeping one other PC constant. Figure 9A is an illustration of how synaptic  
266 waveform changes along each of the five PCs. Figure 9B shows the sensitivity of the LP neuron's burst  
267 onset latency to these changes, either grouped by the PC that was systematically varied while one other  
268 was fixed (Figure 9B1) or grouped by the PC that was fixed while one other was systematically varied  
269 (Figure 9B2). On average, changing the synaptic waveform along each of the PCs, except for PC2, had  
270 some effect on the burst onset latency (Figure 9C). PC3 had the largest effect, followed by PC5. In  
271 addition, fixing PC3 made the LP neuron's burst onset latency insensitive to varying any of the other PCs,  
272 while fixing any of the other PCs did not have that effect (Figure 9D). These results suggest that the  
273 synaptic parameters (PC1 and PC2) that show the largest variation across preparations have little  
274 influence on the burst onset of the LP neuron, whereas two of the synaptic parameters (PC3 and PC5)  
275 which have large effect on the burst onset show little variability and are kept relatively constant across  
276 preparations.

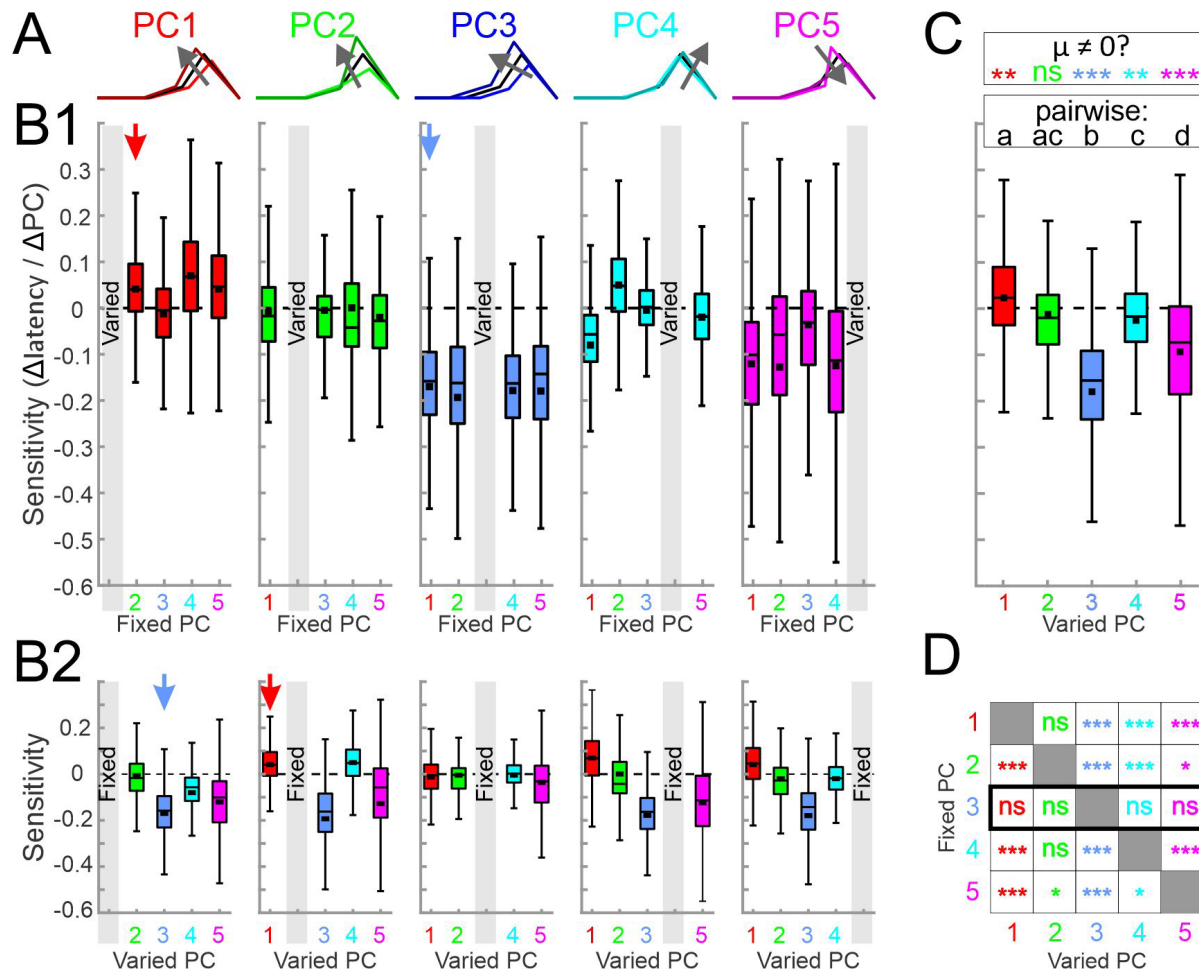

**Figure 9. Varying synaptic waveform shape along each principal component while keeping another principal component constant.** **A.** Graphical representation of how the shape of a representative synaptic waveform (black) changes when synaptic parameters are shifted by 25% in the direction of each principal component (in the direction of the arrow). **B1.** Sensitivity of LP burst onset latency to changing the principal component along a single PC (marked by gray box in each panel) while a single other PC is kept constant (and the other three are not controlled). Examples of the process (marked by arrows) are shown in Fig. 8C & 8D. In these panels, quartile plots are from data including every individual sensitivity value (200-500 data points) in each experiment (N=10 animals). Black squares show mean values. **B2.** The same data as in B1, reorganized so that each panel shows data when a single PC (gray box) is kept constant while a single other PC is varied (and the other 3 are not controlled). The red and blue arrows point to the same data as they do in B1. **C.** Overall sensitivity of LP burst latency (see Fig. 8) to changing the synaptic waveform along each PC, measured as an overall average of the values shown in panel B. In this graph only the mean sensitivity values in each experiment are used as data points, so that each quartile plot correspond N=10 data points. These sensitivities were significantly different (1-W RM-ANOVA  $p < 0.001$ ). Different letters (a-d) indicate  $p < 0.01$  with post-hoc Tukey test; shared letters indicate  $p > 0.05$ . Asterisks indicate post-hoc analysis indicating whether the mean value ( $\mu \neq 0$ ), \*\* $p < 0.001$ , \*\*\* $p < 0.0001$ . **D.** Statistical summary of panel A data, indicating how varying one PC, while keeping another PC constant (and not controlling others), would produce a change in LP burst latency. Asterisks indicate post-hoc analysis indicating whether  $\mu \neq 0$ , \* $p < 0.01$ , \*\* $p < 0.001$ , \*\*\* $p < 0.0001$ .

## 277 Discussion

### 278 Variability of activity phases within and across individuals

279 During oscillatory circuit activity, differences in sensory, descending, and modulatory inputs often result  
280 in different activity phases between different neurons, whereas similar behavioral settings and circuit  
281 states produce characteristic phase relationships (Marder and Bucher, 2001; Wang, 2010; Grillner and El  
282 Manira, 2015; Wilson et al., 2015; Frigon, 2017; Grillner and El Manira, 2020). These activity phases can  
283 even be maintained over a wide range of rhythm frequencies within individuals, which has been  
284 demonstrated in many motor systems (DiCaprio et al., 1997; Wenning et al., 2004; Marder et al., 2005;  
285 Grillner, 2006; Le Gal et al., 2017).

286 Across individuals, activity patterns can vary, particularly in cycle period, but retain enough consistency  
287 in the activity phases to be readily matched across the same individuals. In the pyloric circuit,  
288 spontaneous *in vitro* rhythmic patterns in individual preparations show some cycle-to-cycle variability in  
289 the bursting neurons' activity phases, consistent with cycle-to-cycle variability in cycle period (Bucher et  
290 al., 2005a; Elices et al., 2019). However, mean phases are well maintained when mean cycle period is  
291 experimentally altered (Hooper, 1997; Tang et al., 2012; Soofi et al., 2014). Across individuals, phases  
292 also show some limited variability but are insensitive to substantial differences in mean cycle period  
293 (Bucher et al., 2005a; Goaillard et al., 2009). We confirm here that phases can vary across individuals but  
294 do not correlate with mean cycle period (Figure 1C). We also show that the variability of neuronal  
295 activity phases across individuals is within the same ranges as cycle-to-cycle variability within individuals,  
296 even though cycle period varies substantially more across individuals than it does within individuals  
297 (Figure 1D). This raises the question of whether these activity phases are constrained to a small range of  
298 variability. We assert that there is no absolute measure for how much variability constitutes a lot or a  
299 little, and such an assessment should depend on a reference value. For example, in the leech heartbeat  
300 system, variability in phase has been interpreted as being large because phase values varied as a  
301 substantial fraction of the reference cycle (Wenning et al., 2018). In the pyloric circuit, variability of  
302 phases under control conditions is limited in the sense that phases are largely constrained to values that  
303 differ from those under different neuromodulatory conditions (Marder and Bucher, 2007; Harris-  
304 Warrick, 2011). In our dataset, variability in phase was large enough to allow us to search for  
305 correlations with intrinsic and synaptic current parameters, but the fact that phases remain independent  
306 of cycle period justified asking which parameters may be constrained or may co-vary in a compensatory  
307 manner in order to achieve consistent circuit output phases across individuals.

### 308 Variability of intrinsic and synaptic currents

309 Activity phases are shaped by both intrinsic and synaptic currents, both of which can vary substantially  
310 across individuals. In the LP neuron, the known intrinsic currents vary several-fold across animals (Liu et  
311 al., 1998; Schulz et al., 2006; Schulz et al., 2007; Golowasch, 2014). We found that the voltage-gated  
312 currents do not just vary in magnitude, but that the half-activation voltage and slope factors are also  
313 quite variable across preparations (Figure 2). It should be noted that the magnitude of  $K^+$  conductances  
314 correlate well with corresponding channel gene mRNA copy numbers (Schulz et al., 2006), which serves  
315 as independent confirmation that variability is not solely due to noise or experimental error. We cannot  
316 provide a similar independent confirmation for variability in voltage-dependence, and it is not obvious

317 to which degree half-activation and slope factor measurements may be more affected by experimental  
318 error than  $g_{\max}$  is. However, variability in voltage-dependence may be due to post-translational  
319 modifications of ion channels (Jindal et al., 2008; Voolstra and Huber, 2014; Laedermann et al., 2015) or  
320 their phosphorylation state (Ismailov and Benos, 1995; Hofmann et al., 2014).

321 Not only did we not find any correlations between intrinsic and synaptic currents in the LP neuron, but  
322 we also did not find any correlations between intrinsic current parameters with either cycle period  
323 (Figure 5) or  $\varphi_{\text{LP on}}$  (Figure 6). This does not mean that intrinsic currents do not play an important role in  
324 controlling phase. Intrinsic properties, as determined by voltage-gated ionic currents, pump currents  
325 and even leak currents, are primary determinants of its activity. In the LP neuron, intrinsic properties  
326 have a great influence on  $\varphi_{\text{LP on}}$ , as can be seen for example from the slow response of this neuron to  
327 repetitive dynamic clamp application of the same artificial synaptic input (Figure 7A). This slow response  
328 is indicative of a form of short-term memory over a timescale of many cycles that is attributed to  
329 intrinsic properties (Goaillard et al., 2010; Schneider et al., 2021). Some aspects of phase regulation are  
330 in fact dominated by intrinsic properties. For example, the phase difference between the LP and PY  
331 neurons is largely determined by differences in intrinsic currents, as experimentally applying identical  
332 synaptic input into both neuron types preserves their relative timing (Rabbah and Nadim, 2005).

333 Varying synaptic current amplitudes across individuals can still give rise to similar CPG output, for  
334 example in the leech heartbeat system (Norris et al., 2007; Norris et al., 2011). In the pyloric circuit,  
335 similar values for  $\varphi_{\text{LP on}}$  are achieved across individuals despite large variability of pacemaker synaptic  
336 input during ongoing rhythmic activity (Goaillard et al., 2009). We confirm the substantial variability in  
337 pacemaker to LP synaptic current amplitudes and in addition describe similar variability for PY to LP  
338 input (Figure 3C1). However, phase also depends on the relative timing, duration, and precise temporal  
339 trajectory of synaptic inputs (Prinz et al., 2003; Martinez et al., 2019b). In particular,  $\varphi_{\text{LP on}}$  is exquisitely  
340 sensitive to the shape and amplitude of synaptic input within preparations (Martinez et al., 2019b), and  
341 we show here that attributes describing the trajectory of the total synaptic current input to LP vary  
342 substantially across individuals (Figure 3C2-4). Therefore, similar values of  $\varphi_{\text{LP on}}$  are found across  
343 individuals despite varying intrinsic and synaptic currents.

344 In general, phase is dependent on an interplay of intrinsic and synaptic currents. Because  $\varphi_{\text{LP on}}$  adjusts  
345 over several cycles, any such interplay must occur at a much slower timescale than that of an individual  
346 cycle. Synaptic inhibition activates  $I_H$  and de-inactivates  $I_A$ , which plays a critical role in determining  
347 rebound delay in follower neurons at different cycle periods (Harris-Warrick et al., 1995b; Harris-Warrick  
348 et al., 1995a; MacLean et al., 2005).  $I_H$  and  $I_A$  promote phase maintenance in individuals, particularly in  
349 conjunction with short-term synaptic depression, which results in an increase of inhibition with  
350 increasing cycle periods (Nadim and Manor, 2000; Manor et al., 2003; Bose et al., 2004; Greenberg and  
351 Manor, 2005; Mouser et al., 2008). Goaillard et al. (2009) recorded pyloric circuit activity and  
352 subsequently measured mRNA expression levels of the channel genes coding for  $I_H$  and  $I_A$  in LP, and also  
353 found no correlations with  $\varphi_{\text{LP on}}$ . However, they did find  $\varphi_{\text{LP on}}$  to be correlated with the maximum value  
354 of a neuropeptide-activated current, which was also correlated with synaptic currents. Therefore, a lack  
355 of correlations between cycle period or  $\varphi_{\text{LP on}}$  and single intrinsic current parameters across individuals  
356 may simply mean that variability is well compensated across different currents.

357 The total synaptic current to the LP neuron is a combination of inputs from the pacemaker neurons AB  
358 and PD, and the 3-5 PY neurons, and therefore has a complex waveform shape (Figure 3). Of the 5  
359 parameters that defined the synaptic waveform, three showed significant correlation with  $P$  across  
360 different animals (Figure 5), and four parameters had a strong correlation with  $\varphi_{LP\ on}$  (Figure 6).  
361 Surprisingly, these parameters did not include the strength of the synaptic input from the pacemaker or  
362 PY neurons. Goillard et al. (2009) did not consider PY synaptic inputs to LP but separated AB and PD  
363 inputs by their different reversal potentials and found  $\varphi_{LP\ on}$  correlated with peak values of both, albeit  
364 with different sign. It is unclear whether this different finding simply results from the different way we  
365 defined synaptic strengths. However, the duty cycle and peak phase of the synapse, which strongly  
366 influence the LP phase in individuals (Martinez et al., 2019b) were among the correlated parameters. A  
367 linear dimensionality reduction using principal component analysis showed only two parameters (the  
368 first two principal components PC1 and PC2) sufficiently explained the correlation between cycle period  
369 and  $\varphi_{LP\ on}$ . Consistent with these correlations, using the first two principal components to connect cycle  
370 period across preparations with the variability of  $\varphi_{LP\ on}$  was sufficient to explain phase maintenance  
371 across animals.

## 372 Variability and co-regulation

373 Variability of intrinsic currents in STG neurons may be compensated by cell-type-specific co-regulation of  
374 different voltage-gated channels (Khorkova and Golowasch, 2007; Schulz et al., 2007; Temporal et al.,  
375 2012; Tran et al., 2019), but it is not known to which degree synaptic currents may be co-regulated.  
376 Variability of synaptic currents could be compensated for by variability in intrinsic currents, as has been  
377 suggested for the leech heartbeat system (Gunay et al., 2019), and as is implicit in theoretical work that  
378 shows similar circuit activity with different combinations of intrinsic and synaptic current levels (Prinz et  
379 al., 2004a; Onasch and Gjorgjieva, 2020). Alternatively, compensatory co-regulation of intrinsic currents  
380 could lead to consistent neuronal excitability on its own, and variability of synaptic trajectory then must  
381 be constrained to allow for consistent phases.

382 We found no evidence of co-regulation between intrinsic and synaptic currents (Figure 4), which  
383 suggests that phase constancy across preparations is not due to any obvious linear correlations that  
384 matched synaptic inputs to intrinsic properties. However, there are caveats to this analysis. We only  
385 performed pairwise linear correlations, and it is possible that we missed higher dimensional or nonlinear  
386 interactions. In addition, the nature of the intrinsic and synaptic current attributes we considered are  
387 somewhat mismatched. We described intrinsic voltage-gated currents with standard biophysical  
388 parameters, obtaining values for  $g_{max}$  and voltage-dependence. These parameters can be direct targets  
389 of cellular regulation, but it is not trivial to determine how their variability translates to variability in  
390 current magnitude and trajectory during ongoing circuit activity. In contrast, we assessed the magnitude  
391 and temporal trajectory of synaptic currents during ongoing pyloric activity, which are determined by  
392 pre- and postsynaptic properties as well as the voltage trajectories of the presynaptic neurons (Goillard  
393 et al., 2009). Our synaptic current attributes therefore describe well the dynamics of synaptic  
394 interactions during circuit activity but can only serve as an indirect assessment of biophysical  
395 parameters that would be the targets of cellular regulation. In STG neurons, maximal synaptic currents  
396 or conductances and the dependence on presynaptic voltage have been assessed for their sensitivity to



397 different neuromodulators (Zhao et al., 2011; Garcia et al., 2015; Li et al., 2018), but cannot be  
398 measured during ongoing circuit activity and their inter-individual variability has not been directly  
399 addressed.

#### 400 Correlation versus causation

401 Correlational analyses from spontaneous rhythmic activity restricted us to the limited variability of  
402 circuit output and did not afford us control of the variability of synaptic attributes. We therefore used  
403 the dynamic clamp, a technique that allows precise manipulation of synaptic inputs to individual  
404 neurons, which can be used to explore the role of a synapse in circuit activity (Bartos et al., 1999; Wright  
405 and Calabrese, 2011a, b; Martinez et al., 2019b). These experiments clearly showed that the LP burst  
406 onset is quite sensitive to the shape of the synaptic input waveform in a manner that was consistent  
407 across preparations. To our surprise, changing the waveform along PC1 or PC2, the two major directions  
408 of variability in the parameter space obtained from spontaneous activity, did not produce the largest  
409 influence on the LP burst onset. Instead, changing the waveform along PC5 and PC3, directions that did  
410 not show significant change with either cycle period or the LP burst onset across preparations, had the  
411 largest effect on the LP burst onset. In fact, when the waveform shape was kept constant along PC3,  
412 changing it along any other PC did not influence the LP burst onset at all (Figure 9D). Conversely,  
413 changing the waveform along PC3, while keeping any other PC constant, produced the strongest effects  
414 on the LP burst onset. This clearly indicated that, across preparations, the synaptic waveform was tuned  
415 by the circuit to remain unchanged along this direction of maximum sensitivity. Thus, in this sub-circuit,  
416 phase constancy across preparations is achieved partly by a precise control of the synaptic parameters  
417 that have the largest influence on phase.

418 It is tempting to interpret the correlation of underlying properties with attributes of circuit output as an  
419 indication that these attributes are controlled by these properties. However, properties may simply  
420 change with circuit output and not determine it. Similarly, one may interpret the lack of correlation as a  
421 sign of absence of influence. However, functional influence may be masked by the necessity to simply  
422 constrain parameters with large influence on output to a range that keeps output stable. The  
423 correlational relationships between the synaptic parameters and cycle period or  $\varphi_{LP\ on}$  that we described  
424 from spontaneous circuit output could statistically explain phase maintenance across animals. However,  
425 this explanation does not hold the test of causation. The same parameters that statistically predict  $\varphi_{LP\ on}$ ,  
426 or vary systematically with cycle period, have little influence on the burst onset when varied  
427 experimentally. Conversely, we only found the synaptic waveform attributes that are important for the  
428 control of phase by systematically varying them experimentally. Thus, our correlational explanation  
429 (Figure 7E) is in fact a consistency argument: if some synaptic parameters change with cycle period, then  
430 the same parameter must also change with  $\varphi_{LP\ on}$  in a manner that predicts phase constancy.

431 Many neural processes are found to co-vary across animals and correlations are often argued to be  
432 essential for the function of neural circuits (Golowasch, 2019; Santin and Schulz, 2019). It is important to  
433 remember that, despite the levels of degeneracy observed in the parameter space defining circuit  
434 output (Goldman et al., 2001; Bucher et al., 2005b; Swensen and Bean, 2005), correlations may simply  
435 be coincidental to the fact that the varying parameters do not have a meaningful influence on the  
436 function of interest (Hudson and Prinz, 2010; O'Leary et al., 2013).

437 Considering the numerous parameters that can influence the output of a neural circuit, inter-individual  
438 variability is neither surprising nor avoidable. Yet a consistent output pattern requires some essential  
439 combination of circuit parameters to be tightly constrained. Those that are not show variability across  
440 individuals and, because of the constraints of the output pattern, are forced to co-vary with output  
441 quantities that may also be relatively unconstrained, such as cycle frequency. Thus, parameters  
442 correlated with circuit output may contribute little to the output pattern, but rather become correlated  
443 because of constraints on this pattern.

#### 444 [Differential control of activity phases](#)

445 We addressed here how activity phases can stay consistent under control conditions, i.e., in the same  
446 circuit state. However, synaptic function and activity phases can be different between different circuit  
447 states, for example through the influence of neuromodulators (Harris-Warrick, 2011; Marder, 2012;  
448 Bucher and Marder, 2013; Marder et al., 2014b; Nadim and Bucher, 2014; Daur et al., 2016; Brzosko et  
449 al., 2019). In motor systems, the functional impact of such adjustments can be particularly transparent,  
450 as circuit reconfiguration through neuromodulation is for example a core mechanism for adjusting  
451 locomotion gait and speed (Harris-Warrick, 2011; Miles and Sillar, 2011; Bucher et al., 2015; Kiehn,  
452 2016; Grillner and El Manira, 2020). Neuromodulators can affect neurotransmitter release, receptor  
453 properties, and postsynaptic intrinsic response properties (Nadim and Bucher, 2014). In addition,  
454 synaptic function can change because the activity profile of the presynaptic neuron is modified, as has  
455 been shown for STG neurons (Johnson et al., 2005; Johnson et al., 2011; Zhao et al., 2011). All these  
456 actions of neuromodulators can alter the temporal trajectory of synaptic responses. Therefore, our  
457 results provide a useful framework for understanding which aspects of the temporal dynamics of  
458 synaptic inputs can be altered by neuromodulators to change phase, and which changes phase  
459 relationships can be robust to.

## 460 [Methods](#)

### 461 [Experimental preparation](#)

462 Adult male crabs (*Cancer borealis*) were acquired from local distributors and maintained in aquaria filled  
463 with chilled (12-13°C) artificial sea water until use. Crabs were anesthetized before dissection by placing  
464 them in ice for at least 20 minutes. The stomatogastric nervous system including the stomatogastric  
465 ganglion (STG), esophageal ganglion, the pair of commissural ganglia, and the motor nerves were  
466 dissected from the stomach and pinned to a saline filled, Sylgard-coated (Dow Corning) Petri dish  
467 (schematic in Figure 1A). The STG was desheathed, exposing the somata of the neurons for intracellular  
468 impalement. Preparations were superfused with chilled (10-13°C) physiological saline containing: 11 mM  
469 KCl, 440 mM NaCl, 13 mM CaCl<sub>2</sub> · 2H<sub>2</sub>O, 26 mM MgCl<sub>2</sub> · 6H<sub>2</sub>O, 11.2 mM Tris base, 5.1 mM maleic acid  
470 with a pH of 7.4.

### 471 [Extracellular recordings of rhythmic patterns](#)

472 Extracellular recordings from identified motor nerves were performed using pairs of stainless steel  
473 electrodes, placed inside and outside of a petroleum jelly well created to electrically isolate a small  
474 section of the nerve, and amplified using a differential AC amplifier (A-M Systems, model 1700). All

475 traces were digitized using a Digidata 1332 data acquisition board and recorded in pClamp 10 software  
476 (both Molecular Devices).

477 The activity of three neuron types was used to identify the triphasic pyloric pattern (Marder and Bucher,  
478 2007). The two pyloric dilator (PD) neurons belong to the pyloric pacemaker group of neurons, and we  
479 therefore used their burst onset as the reference time that defined each cycle of activity. The pyloric  
480 constrictor neurons include the single lateral pyloric (LP) neuron and multiple pyloric (PY) neurons. The  
481 constrictor neurons are follower neurons that receive strong inhibition from the pacemaker group and  
482 rebound from this inhibition to produce bursting activity at different phases. Spontaneous rhythmic  
483 pyloric activity was recorded from the lateral ventricular nerve (*lvn*), the pyloric dilator nerve (*pdn*), and  
484 occasionally also from the pyloric nerve (*pyn*) (Fig. 1A, nomenclature after Maynard and Dando, 1974).  
485 The *lvn* contains the axons of all three neuron types, with LP action potentials easily identifiable by  
486 their large amplitude. The *pdn* contains only the axons of the PD neurons, and the *pyn* only those of the  
487 PY neurons.

#### 488 Intracellular recordings and voltage clamp

489 For intracellular impalement of the LP neuron soma, glass microelectrodes were prepared using the  
490 Flaming-Brown micropipette puller (P97; Sutter Instruments) and filled with 0.6 M K<sub>2</sub>SO<sub>4</sub> and 20 mM KCl,  
491 yielding electrode resistances of 10-30 MΩ. Individual pyloric neurons were sequentially impaled, and  
492 the LP neuron was identified by its activity pattern and correspondence of action potentials between the  
493 soma recording and the extracellular recording of the *lvn* (Figure 1A). Recordings were amplified using  
494 Axoclamp 2B and 900A amplifiers (Molecular Devices) and recorded alongside the extracellular signals in  
495 pClamp. For current measurements, the LP soma was simultaneously impaled with two electrodes, and  
496 membrane potential was controlled in two electrode voltage clamp mode.

#### 497 Measurements of voltage-gated currents

498 In LP and other pyloric neurons, three intrinsic voltage-gated currents are relatively straightforward to  
499 measure in the intact circuit, without pharmacological manipulation (Zhao and Golowasch, 2012): the  
500 high-threshold K<sup>+</sup> current (*I*<sub>HTK</sub>), the fast transient K<sup>+</sup> current (*I*<sub>A</sub>), and the hyperpolarization-activated  
501 inward current (*I*<sub>H</sub>).

502 *I*<sub>HTK</sub>, consisting of the delayed rectifier and calcium-dependent K<sup>+</sup> currents (Khorkova and Golowasch,  
503 2007), was measured from the responses to voltage steps following a ~270 ms pre-step to -40 mV to  
504 inactivate *I*<sub>A</sub>. Voltage steps (750 ms) were delivered from -60 mV to +30 mV, in increments of 10 mV. In  
505 addition to subtracting the baseline current at -40 mV, the current recorded from the smallest voltage  
506 step was used to estimate the leak current, scaled proportionally for all voltage steps, and subtracted  
507 offline. The persistent component (*I*<sub>HTKp</sub>) was measured by taking an average of current recorded during  
508 the last 70 ms of a voltage step (90-99% of step duration). The transient component (*I*<sub>HTKt</sub>) was measured  
509 by taking the current peak, recorded during the first 150 ms of the voltage step.

510 *I*<sub>A</sub> was obtained by recording the total K<sup>+</sup> current (*I*<sub>Ktot</sub>) and digitally subtracting the previously measured  
511 *I*<sub>HTK</sub>. The neuron was held at -80 mV to remove inactivation. *I*<sub>Ktot</sub> was then activated using voltage steps  
512 from -60 mV to +40mV in 10 mV increments. After subtracting *I*<sub>HTK</sub> from *I*<sub>Ktot</sub>, the difference current was  
513 baseline subtracted. Because these currents were recorded without blocking sodium currents, effects of

514 spikes generated in the electrotonically relatively distant axon were seen in the  $I_A$  traces (Fig. 2A, see  
515 also Zhao and Golowasch, 2012). Before measuring the peak amplitude of the currents, we used a  
516 robust smoothing function to remove the action potential-mediated transients. The amplitude of  $I_A$  was  
517 measured as the maximum during the first 150 ms of the voltage step.

518  $I_{HTKp}$ ,  $I_{HTKt}$ , and  $I_A$  were converted into conductances using the voltage-current relationships and an  
519 estimated  $K^+$  reversal potential ( $E_K$ ) of -85 mV. We then fit a standard sigmoid equation to a plot of  
520 conductance over membrane potential:

$$I_X = g_X(V - E_K)$$

$$g_X = \frac{g_{max}}{1 + \exp(-(V - V_{1/2}) / k)}$$

521

522 (X = HTKp, HTKt, or A). The sigmoid fits yielded values for maximal conductance ( $g_{max}$ ), voltage of half-  
523 activation ( $V_{1/2}$ ) and slope factor ( $k$ ).

524  $I_H$  was measured by holding LP at -40 mV for > 1.5 s and then stepping to more negative potentials  
525 between -60 mV and -120 mV for 5 s, in increments of 10 mV. Because of the small and variable size of  $I_H$   
526 in the LP neuron, it is difficult to measure an accurate activation curve or reversal potential at  
527 physiological temperatures, particularly because rhythmic synaptic currents occur at similar amplitudes.  
528 Therefore, we only used the response to the step to -120 mV to estimate  $I_H$ . The current was calculated  
529 by taking the difference between the current at the beginning and just before the end of the voltage  
530 step. The measured current was converted into conductance using a reversal potential of -30 mV  
531 (Buchholtz et al., 1992). In two preparations, the LP neuron did not have any measurable  $I_H$ .

### 532 Measurements of synaptic currents

533 Pyloric neurons receive mainly graded inhibitory synaptic input. Because LP is a follower neuron, pyloric  
534 oscillations continue while the LP neuron is voltage clamped, thus allowing for measurement of the  
535 IPSCs (Martinez et al., 2019b). LP was voltage clamped at a holding potential of -50 mV for at least 30 s.  
536 The current was averaged from the last 5 cycles measured, and a resulting unitary waveform was  
537 extracted. This unitary waveform was tagged at five distinct points,  $t_0$  to  $t_4$  (with the cycle period  $P = t_4 -$   
538  $t_0$ ), which were connected using a piecewise linear graph (Figure 3B). The IPSC can be defined as the  
539 duration of this waveform from  $t_1$  to  $t_4$ . The baseline of the IPSC ( $I = 0$ ) was defined as the IPSC onset  
540 value at time  $t_1$ . The IPSC waveform was normalized by  $P$ . Thus, the IPSC waveform can be characterized  
541 fully using the following parameters:

542 • Phase parameters:

- 543 1.  $DC_{LP}$ : duty cycle of the LP burst preceding the phases of synaptic input ( $= (t_1 - t_0) / P$ ),
- 544 2.  $DC_{PY}$ : duty cycle of the PY component of the IPSC ( $= (t_2 - t_1) / P$ ),
- 545 3.  $DC_{PD}$ : duty cycle of the pacemaker component of the IPSC ( $= (t_4 - t_2) / P$ ),
- 546 4.  $\theta_{LP}$ : peak phase of the synapse within the cycle, relative to the onset of the LP burst ( $= (t_3 -$   
547  $t_0) / P$ ),

- 548 5.  $\theta_{PD}$ : peak phase of the synapse within the cycle, relative to the onset of the PD burst ( $= (t_3 -$   
549  $t_2) / P$ ),  
550 6.  $\Delta_{pk}$ : peak phase of the synapse within the IPSC ( $= (t_3 - t_1) / (t_4 - t_1)$ ).  
551 • Amplitude parameters:  
552 7.  $I_{tot}$ : the maximum IPSC amplitude,  
553 8.  $I_{PD}$ : amplitude of the pacemaker component of the IPSC,  
554 9.  $I_{PY}$ : amplitude of the PY component of the IPSC ( $= I_{tot} - I_{PD}$ ).  
555 • Slope parameters:  
556 10.  $m_{PY}$ : rise slope of the PY component ( $= I_{PY} / (t_2 - t_1)$ ),  
557 11.  $m_{PD}$ : rise slope of the pacemaker component ( $= I_{PD} / (t_3 - t_2)$ ),  
558 12.  $m_{fall}$ : decay rate of the IPSC ( $= I_{tot} / (t_4 - t_3)$ ).

559 Clearly, these parameters are not independent and include redundant ones. We defined all parameters  
560 in order to maintain the clarity of the biophysical interpretation of the IPSC and the contributing  
561 network components. However, for correlations between synaptic parameters and between synaptic  
562 and intrinsic current parameters, we defined the non-redundant subset, which consists of the following  
563 5 parameters:

564  $DC_{PY}$ ,  $DC_{PD}$ ,  $\Delta_{pk}$ ,  $m_{PY}$ , and  $m_{fall}$ .

565 The other 7 parameters can be calculated from these values using simple geometry:

$$DC_{LP} = 1 - (DC_{PD} + DC_{PY})$$

$$\theta_{PD} = \Delta_{pk} \cdot (DC_{PD} + DC_{PY})$$

$$\theta_{LP} = \theta_{PD} + DC_{LP} = (1 - \Delta_{pk}) \cdot (DC_{PD} + DC_{PY})$$

$$I_{tot} = m_{fall} \cdot P \cdot (\theta_{LP} - 1)$$

$$I_{PD} = I_{tot} - I_{PY} = m_{fall} \cdot P \cdot (\theta_{LP} - 1) - m_{PY} \cdot DC_{PY} \cdot P$$

$$I_{PY} = m_{PY} \cdot P \cdot DC_{PY}$$

$$m_{PD} = \frac{I_{PD}}{\theta_{PD} \cdot P} = \frac{m_{fall} \cdot (\theta_{LP} - 1) - m_{PY} \cdot DC_{PY}}{\Delta_{pk} \cdot (DC_{PD} + DC_{PY}) - DC_{PY}}$$

566  
567 Note that the synaptic conductance waveform was taken to be identical to the synaptic current  
568 waveform measured in voltage clamp, as synaptic current at a constant holding potential simply scales  
569 with synaptic conductance.

## 570 [Dynamic clamp application of artificial synaptic input current](#)

571 Dynamic clamp was implemented using the NetClamp software (Gotham Scientific) on a 64-bit Windows  
572 7 PC using an NI PCI-6070-E board (National Instruments). We used dynamic clamp to inject artificial  
573 synaptic currents ( $I_{syn}$ ) into the synaptically isolated LP neuron (Prinz et al., 2004b; Zhao et al., 2010;  
574 Chen et al., 2016; Golowasch et al., 2017; Martinez et al., 2019b). In these experiments, the  
575 preparations were superfused with saline containing  $10^{-5}$  M picrotoxin (Sigma Aldrich) to block the bulk  
576 of synaptic input to the LP neuron (Martinez et al., 2019a).

577 The dynamic clamp injected current  $I_{syn}$  was defined as

578 
$$I_{syn} = g_{syn}(V - E_{syn})$$

579 where  $g_{syn}$  is the synaptic conductance and  $E_{syn}$  is the synaptic reversal potential (set to -80 mV).  $g_{syn}$  was  
580 defined as a unitary stereotypical piecewise-linear waveform, mimicking the experimentally measured  
581 synaptic conductance. The unitary synaptic conductance waveforms were constructed using the  
582 following algorithm:

- 583
- $I_{tot} = 1$ .
  - 584 •  $DC_{LP} + DC_{PY} + DC_{PD} = 1$ .
  - 585 •  $DC_{LP}$ ,  $DC_{PY}$ ,  $\theta_{PD}$  and  $I_{PY}$  were chosen from the values between 0 and 1, in increments of 0.2.
  - 586 •  $m_{PD} > m_{PY}$
  - 587 •  $DC_{LP} + DC_{PY} + \theta_{PD} < 1$ .

588 These rules yielded a total of 80 waveforms, including a few duplicates. Each waveform was applied  
589 periodically with a cycle period of 1 s and a peak amplitude of 0.4  $\mu$ S. In each trial, the artificial synaptic  
590 input was applied for at least 30 s.

591 In these experiments, the bursting activity of the LP neuron was quantified by measuring the latency of  
592 the burst onset compared to the end of the conductance waveform ( $t_4$  in Figure 3B1; latency shown in  
593 Figure 8A). Note that this is different from the burst latency measured for calculating the LP phase  
594 during an ongoing pyloric rhythm (Figure 1A, right panel), which is measured with respect to the onset  
595 of the pacemaker PD neuron bursts. However, our primary goal in these experiments was to understand  
596 how changing the shape of the synaptic input influenced the activity of the LP neuron. The  
597 corresponding reference point in the dynamic clamp experiments would have been the onset of the  
598 pacemaker component of the synaptic input ( $t_2$  in Figure 3B1). However, had we measured latency with  
599 respect to  $t_2$ , our calculation of latency would have given the appearance that it changes with the  
600 waveforms, even if there was absolutely no change in the LP neuron activity. This is because  $t_2$  is quite  
601 different across the 80 waveforms (Figure 8B). The end of the conductance waveform is the only  
602 reference point that accurately reports changes in the LP activity due to the waveform shape is the end  
603 timepoint of the synaptic waveform.

## 604 Data analysis

605 All analysis was performed using custom scripts written in MATLAB (MathWorks). All linear correlations  
606 were measured using MATLAB built-in function 'corr', which computes Pearson's linear correlation  
607 coefficient. Principal component analysis was performed using the MATLAB 'pca' function. Figures were  
608 plotted in MATLAB and panels were assembled in CorelDRAW (version 2020, Corel).

609 The activity phase ( $\varphi_{LP\ on}$ ) of the LP neuron burst onset is defined as the time interval between the onset  
610 of the pacemaker PD neuron's burst to the onset of the LP neuron burst, normalized by the period ( $P$ ) of  
611 that cycle, defined as the time interval between the two consequent PD neuron bursts (Figure. 1A). To  
612 examine the effect of changing the synaptic waveform along each principal component (using dynamic  
613 clamp) on  $\varphi_{LP\ on}$ , for each principal component  $PC_j$  ( $j = 1, \dots, 5$ ), we projected all 80 synaptic waveforms

614 onto the plane defined by  $PC_j$  and each  $PC_k$  ( $k \neq j$ ). We then found all waveform pairs (say  $w_n$  and  $w_m$ )  
615 that fell within  $\pm 0.1$  of each  $PC_k$  value and were different by at least 0.1 in  $PC_j$ , and measured  $\varphi_{LP\ on}$  for  
616 each waveform. (In this analysis, to exclude any effect of the duration of inhibition, we computed  $\varphi_{LP\ on}$   
617 by calculating the latency as the time-to-first-spike of the burst relative to the end of dynamic clamp  
618 inhibition, and then divided this latency by  $P$ .) We then calculated the sensitivity of the LP burst onset  
619 latency (lat) for this pair of waveforms  $w_n$  and  $w_m$  as

$$620 \quad s_{nm} = \frac{\text{lat}(w_n) - \text{lat}(w_m)}{PC_j(w_n) - PC_j(w_m)}$$

621 (here,  $PC_j(w_n)$  is assumed to be  $> PC_j(w_m)$ ). We reported the sensitivity of  $\varphi_{LP\ on}$  to  $PC_j$ , while keeping  $PC_k$   
622 constant, as the statistical distribution defined by  $s_{nm}$  values in all preparations (200-500 data points,  
623 depending on  $j$  and  $k$ ). The overall sensitivity burst latency to  $PC_j$  in each preparation was calculated as  
624 the mean value of all  $s_{nm}$  values when changing  $PC_j$ , while keeping  $PC_k$  constant, for all  $k \neq j$ , in that  
625 preparation.

## 626 Acknowledgements

627 This study was supported by NIH MH060605.

## 628 Competing interests

629 The authors declare no competing interests.

## 630 References

- 631 Abbott LF, Marder E, Hooper SL (1991) Oscillating Networks: Control of Burst Duration by Electrically  
632 Coupled Neurons. *Neural Comput* 3:487-497.
- 633 Ainsworth M, Lee S, Cunningham MO, Traub RD, Kopell NJ, Whittington MA (2012) Rates and rhythms: a  
634 synergistic view of frequency and temporal coding in neuronal networks. *Neuron* 75:572-583.
- 635 Bartos M, Manor Y, Nadim F, Marder E, Nusbaum MP (1999) Coordination of fast and slow rhythmic  
636 neuronal circuits. *J Neurosci* 19:6650-6660.
- 637 Bidaye SS, Bockemuhl T, Buschges A (2018) Six-legged walking in insects: how CPGs, peripheral  
638 feedback, and descending signals generate coordinated and adaptive motor rhythms. *J*  
639 *Neurophysiol* 119:459-475.
- 640 Bose A, Manor Y, Nadim F (2004) The activity phase of postsynaptic neurons in a simplified rhythmic  
641 network. *J Comput Neurosci* 17:245-261.
- 642 Brzosko Z, Mierau SB, Paulsen O (2019) Neuromodulation of Spike-Timing-Dependent Plasticity: Past,  
643 Present, and Future. *Neuron* 103:563-581.
- 644 Bucher D, Marder E (2013) SnapShot: Neuromodulation. *Cell* 155:482-482 e481.
- 645 Bucher D, Prinz AA, Marder E (2005a) Animal-to-animal variability in motor pattern production in adults  
646 and during growth. *J Neurosci* 25:1611-1619.
- 647 Bucher D, Johnson CD, Taylor AL, Marder E (2005b) Neuronal morphology and neuropil structure in the  
648 stomatogastric ganglion. Abstract Viewer/Itinerary Planner, Society for Neuroscience Program  
649 No.752.18.
- 650 Bucher D, Haspel G, Golowasch J, Nadim F (2015) Central Pattern Generators. In: eLS (John Wiley & Sons  
651 L, ed): John Wiley & Sons, Ltd.

- 652 Buchholtz F, Golowasch J, Epstein IR, Marder E (1992) Mathematical model of an identified  
653 stomatogastric ganglion neuron. *J Neurophysiol* 67:332-340.
- 654 Buzsaki G, Wang XJ (2012) Mechanisms of gamma oscillations. *Annu Rev Neurosci* 35:203-225.
- 655 Buzsaki G, Tingley D (2018) Space and Time: The Hippocampus as a Sequence Generator. *Trends Cogn  
656 Sci* 22:853-869.
- 657 Calabrese RL, Norris BJ, Wenning A (2016) The neural control of heartbeat in invertebrates. *Curr Opin  
658 Neurobiol* 41:68-77.
- 659 Calabrese RL, Norris BJ, Wenning A, Wright TM (2011) Coping with variability in small neuronal  
660 networks. *Integr Comp Biol* 51:845-855.
- 661 Chen Y, Li X, Rotstein HG, Nadim F (2016) Membrane potential resonance frequency directly influences  
662 network frequency through electrical coupling. *J Neurophysiol* 116:1554-1563.
- 663 Daur N, Nadim F, Bucher D (2016) The complexity of small circuits: the stomatogastric nervous system.  
664 *Curr Opin Neurobiol* 41:1-7.
- 665 DiCaprio R, Jordan G, Hampton T (1997) Maintenance of motor pattern phase relationships in the  
666 ventilatory system of the crab. *J Exp Biol* 200:963-974.
- 667 Dragoi G (2020) Cell assemblies, sequences and temporal coding in the hippocampus. *Curr Opin  
668 Neurobiol* 64:111-118.
- 669 Elices I, Levi R, Arroyo D, Rodriguez FB, Varona P (2019) Robust dynamical invariants in sequential neural  
670 activity. *Sci Rep* 9:9048.
- 671 Franci A, O'Leary T, Golowasch J (2020) Positive dynamical networks in neuronal regulation: how tunable  
672 variability coexists with robustness. *IEEE Control Systems Letters* 4:946-951.
- 673 Frigon A (2017) The neural control of interlimb coordination during mammalian locomotion. *J  
674 Neurophysiol* 117:2224-2241.
- 675 Garcia VJ, Daur N, Temporal S, Schulz DJ, Bucher D (2015) Neuropeptide receptor transcript expression  
676 levels and magnitude of ionic current responses show cell type-specific differences in a small  
677 motor circuit. *J Neurosci* 35:6786-6800.
- 678 Goaillard JM, Taylor AL, Schulz DJ, Marder E (2009) Functional consequences of animal-to-animal  
679 variation in circuit parameters. *Nat Neurosci* 12:1424-1430.
- 680 Goaillard JM, Taylor AL, Pulver SR, Marder E (2010) Slow and persistent postinhibitory rebound acts as  
681 an intrinsic short-term memory mechanism. *J Neurosci* 30:4687-4692.
- 682 Goldman MS, Golowasch J, Marder E, Abbott LF (2001) Global structure, robustness, and modulation of  
683 neuronal models. *J Neurosci* 21:5229-5238.
- 684 Golowasch J (2014) Ionic Current Variability and Functional Stability in the Nervous System. *Bioscience*  
685 64:570-580.
- 686 Golowasch J (2019) Neuromodulation of central pattern generators and its role in the functional  
687 recovery of central pattern generator activity. *J Neurophysiol* 122:300-315.
- 688 Golowasch J, Goldman MS, Abbott LF, Marder E (2002) Failure of averaging in the construction of a  
689 conductance-based neuron model. *J Neurophysiol* 87:1129-1131.
- 690 Golowasch J, Bose A, Guan Y, Salloum D, Roeser A, Nadim F (2017) A balance of outward and linear  
691 inward ionic currents is required for generation of slow-wave oscillations. *J Neurophysiol*  
692 118:1092-1104.
- 693 Greenberg I, Manor Y (2005) Synaptic depression in conjunction with A-current channels promote phase  
694 constancy in a rhythmic network. *J Neurophysiol* 93:656-677.
- 695 Grillner S (2006) Biological pattern generation: the cellular and computational logic of networks in  
696 motion. *Neuron* 52:751-766.
- 697 Grillner S, El Manira A (2015) The intrinsic operation of the networks that make us locomote. *Curr Opin  
698 Neurobiol* 31:244-249.



- 699 Grillner S, El Manira A (2020) Current Principles of Motor Control, with Special Reference to Vertebrate  
700 Locomotion. *Physiol Rev* 100:271-320.
- 701 Gunay C, Doloc-Mihu A, Lamb DG, Calabrese RL (2019) Synaptic Strengths Dominate Phasing of Motor  
702 Circuit: Intrinsic Conductances of Neuron Types Need Not Vary across Animals. *eNeuro* 6.
- 703 Hajos N, Palhalmi J, Mann EO, Nemeth B, Paulsen O, Freund TF (2004) Spike timing of distinct types of  
704 GABAergic interneuron during hippocampal gamma oscillations in vitro. *J Neurosci* 24:9127-  
705 9137.
- 706 Hamood AW, Marder E (2014) Animal-to-Animal Variability in Neuromodulation and Circuit Function.  
707 *Cold Spring Harb Symp Quant Biol* 79:21-28.
- 708 Harris-Warrick RM (2002) Voltage-sensitive ion channels in rhythmic motor systems. *Curr Opin*  
709 *Neurobiol* 12:646-651.
- 710 Harris-Warrick RM (2011) Neuromodulation and flexibility in Central Pattern Generator networks. *Curr*  
711 *Opin Neurobiol* 21:685-692.
- 712 Harris-Warrick RM, Coniglio LM, Levini RM, Gueron S, Guckenheimer J (1995a) Dopamine modulation of  
713 two subthreshold currents produces phase shifts in activity of an identified motoneuron. *J*  
714 *Neurophysiol* 74:1404-1420.
- 715 Harris-Warrick RM, Coniglio LM, Barazangi N, Guckenheimer J, Gueron S (1995b) Dopamine modulation  
716 of transient potassium current evokes phase shifts in a central pattern generator network. *J*  
717 *Neurosci* 15:342-358.
- 718 Hasselmo ME, Bodelon C, Wyble BP (2002) A proposed function for hippocampal theta rhythm: separate  
719 phases of encoding and retrieval enhance reversal of prior learning. *Neural Comput* 14:793-817.
- 720 Hofmann F, Flockerzi V, Kahl S, Wegener JW (2014) L-type CaV1.2 calcium channels: from in vitro  
721 findings to in vivo function. *Physiol Rev* 94:303-326.
- 722 Hooper SL (1997) Phase maintenance in the pyloric pattern of the lobster (*Panulirus interruptus*)  
723 stomatogastric ganglion. *J Comput Neurosci* 4:191-205.
- 724 Hudson AE, Prinz AA (2010) Conductance ratios and cellular identity. *PLoS Comput Biol* 6:e1000838.
- 725 Ismailov, II, Benos DJ (1995) Effects of phosphorylation on ion channel function. *Kidney Int* 48:1167-  
726 1179.
- 727 Jindal HK, Folco EJ, Liu GX, Koren G (2008) Posttranslational modification of voltage-dependent  
728 potassium channel Kv1.5: COOH-terminal palmitoylation modulates its biological properties. *Am*  
729 *J Physiol Heart Circ Physiol* 294:H2012-2021.
- 730 Johnson BR, Schneider LR, Nadim F, Harris-Warrick RM (2005) Dopamine modulation of phasing of  
731 activity in a rhythmic motor network: contribution of synaptic and intrinsic modulatory actions. *J*  
732 *Neurophysiol* 94:3101-3111.
- 733 Johnson BR, Brown JM, Kvarita MD, Lu JY, Schneider LR, Nadim F, Harris-Warrick RM (2011) Differential  
734 modulation of synaptic strength and timing regulate synaptic efficacy in a motor network. *J*  
735 *Neurophysiol* 105:293-304.
- 736 Katz PS (2016) Evolution of central pattern generators and rhythmic behaviours. *Philos Trans R Soc Lond*  
737 *B Biol Sci* 371:20150057.
- 738 Khorkova O, Golowasch J (2007) Neuromodulators, not activity, control coordinated expression of ionic  
739 currents. *J Neurosci* 27:8709-8718.
- 740 Kiehn O (2016) Decoding the organization of spinal circuits that control locomotion. *Nat Rev Neurosci*  
741 17:224-238.
- 742 Kloppenburg P, Levini RM, Harris-Warrick RM (1999) Dopamine modulates two potassium currents and  
743 inhibits the intrinsic firing properties of an identified motor neuron in a central pattern  
744 generator network. *J Neurophysiol* 81:29-38.
- 745 Laedermann CJ, Abriel H, Decosterd I (2015) Post-translational modifications of voltage-gated sodium  
746 channels in chronic pain syndromes. *Front Pharmacol* 6:263.

- 747 Le Gal JP, Dubuc R, Smarandache-Wellmann C (2017) Coordination of Rhythmic Movements. In:  
748 Neurobiology of Motor Control: Fundamental Concepts and New Directions (Hooper SL,  
749 Buschges A, eds). Hoboken, New Jersey: Wiley-Blackwell.
- 750 Li X, Bucher D, Nadim F (2018) Distinct Co-Modulation Rules of Synapses and Voltage-Gated Currents  
751 Coordinate Interactions of Multiple Neuromodulators. *J Neurosci* 38:8549-8562.
- 752 Liu Z, Golowasch J, Marder E, Abbott LF (1998) A model neuron with activity-dependent conductances  
753 regulated by multiple calcium sensors. *J Neurosci* 18:2309-2320.
- 754 MacLean JN, Zhang Y, Johnson BR, Harris-Warrick RM (2003) Activity-independent homeostasis in  
755 rhythmically active neurons. *Neuron* 37:109-120.
- 756 MacLean JN, Zhang Y, Goeritz ML, Casey R, Oliva R, Guckenheimer J, Harris-Warrick RM (2005) Activity-  
757 Independent Co-Regulation of IA and Ih in Rhythmically Active Neurons. *J Neurophysiol*.
- 758 Manor Y, Bose A, Booth V, Nadim F (2003) Contribution of synaptic depression to phase maintenance in  
759 a model rhythmic network. *J Neurophysiol* 90:3513-3528.
- 760 Marder E (2011) Variability, compensation, and modulation in neurons and circuits. *Proc Natl Acad Sci U*  
761 *S A* 108 Suppl 3:15542-15548.
- 762 Marder E (2012) Neuromodulation of neuronal circuits: back to the future. *Neuron* 76:1-11.
- 763 Marder E, Bucher D (2001) Central pattern generators and the control of rhythmic movements. *Curr Biol*  
764 11:R986-996.
- 765 Marder E, Goaillard JM (2006) Variability, compensation and homeostasis in neuron and network  
766 function. *Nat Rev Neurosci* 7:563-574.
- 767 Marder E, Bucher D (2007) Understanding circuit dynamics using the stomatogastric nervous system of  
768 lobsters and crabs. *Annu Rev Physiol* 69:291-316.
- 769 Marder E, Goeritz ML, Otopalik AG (2014a) Robust circuit rhythms in small circuits arise from variable  
770 circuit components and mechanisms. *Curr Opin Neurobiol* 31C:156-163.
- 771 Marder E, O'Leary T, Shruti S (2014b) Neuromodulation of circuits with variable parameters: single  
772 neurons and small circuits reveal principles of state-dependent and robust neuromodulation.  
773 *Annu Rev Neurosci* 37:329-346.
- 774 Marder E, Bucher D, Schulz DJ, Taylor AL (2005) Invertebrate central pattern generation moves along.  
775 *Curr Biol* 15:R685-699.
- 776 Martinez D, Santin JM, Schulz D, Nadim F (2019a) The differential contribution of pacemaker neurons to  
777 synaptic transmission in the pyloric network of the Jonah crab, *Cancer borealis*. *J Neurophysiol*  
778 122:1623-1633.
- 779 Martinez D, Anwar H, Bose A, Bucher DM, Nadim F (2019b) Short-term synaptic dynamics control the  
780 activity phase of neurons in an oscillatory network. *Elife* 8.
- 781 Maynard DM, Dando MR (1974) The structure of the stomatogastric neuromuscular system in  
782 *Callinectes sapidus*, *Homarus americanus* and *Panulirus argus* (Decapoda Crustacea). *Philos*  
783 *Trans R Soc Lond B* 268:161-220.
- 784 McDonnell MD, Graham BP (2017) Phase changes in neuronal postsynaptic spiking due to short term  
785 plasticity. *PLoS Comput Biol* 13:e1005634.
- 786 Miles GB, Sillar KT (2011) Neuromodulation of vertebrate locomotor control networks. *Physiology*  
787 (Bethesda) 26:393-411.
- 788 Mouser C, Nadim F, Bose A (2008) Maintaining phase of the crustacean tri-phasic pyloric rhythm. *J Math*  
789 *Biol* 57:161-181.
- 790 Mullins OJ, Hackett JT, Buchanan JT, Friesen WO (2011) Neuronal control of swimming behavior:  
791 comparison of vertebrate and invertebrate model systems. *Prog Neurobiol* 93:244-269.
- 792 Nadim F, Manor Y (2000) The role of short-term synaptic dynamics in motor control. *Curr Opin*  
793 *Neurobiol* 10:683-690.
- 794 Nadim F, Bucher D (2014) Neuromodulation of neurons and synapses. *Curr Opin Neurobiol* 29C:48-56.

- 795 Norris BJ, Wenning A, Wright TM, Calabrese RL (2011) Constancy and variability in the output of a  
796 central pattern generator. *J Neurosci* 31:4663-4674.
- 797 Norris BJ, Weaver AL, Wenning A, Garcia PS, Calabrese RL (2007) A central pattern generator producing  
798 alternative outputs: pattern, strength, and dynamics of premotor synaptic input to leech heart  
799 motor neurons. *J Neurophysiol* 98:2992-3005.
- 800 O'Leary T, Williams AH, Caplan JS, Marder E (2013) Correlations in ion channel expression emerge from  
801 homeostatic tuning rules. *Proc Natl Acad Sci U S A* 110:E2645-2654.
- 802 O'Leary T, Williams AH, Franci A, Marder E (2014) Cell types, network homeostasis, and pathological  
803 compensation from a biologically plausible ion channel expression model. *Neuron* 82:809-821.
- 804 Onasch S, Gjorgjieva J (2020) Circuit Stability to Perturbations Reveals Hidden Variability in the Balance  
805 of Intrinsic and Synaptic Conductances. *J Neurosci* 40:3186-3202.
- 806 Oren I, Mann EO, Paulsen O, Hajos N (2006) Synaptic currents in anatomically identified CA3 neurons  
807 during hippocampal gamma oscillations in vitro. *J Neurosci* 26:9923-9934.
- 808 Prinz AA, Thirumalai V, Marder E (2003) The functional consequences of changes in the strength and  
809 duration of synaptic inputs to oscillatory neurons. *J Neurosci* 23:943-954.
- 810 Prinz AA, Bucher D, Marder E (2004a) Similar network activity from disparate circuit parameters. *Nat*  
811 *Neurosci* 7:1345-1352.
- 812 Prinz AA, Abbott LF, Marder E (2004b) The dynamic clamp comes of age. *Trends Neurosci* 27:218-224.
- 813 Rabbah P, Nadim F (2005) Synaptic dynamics do not determine proper phase of activity in a central  
814 pattern generator. *J Neurosci* 25:11269-11278.
- 815 Ransdell JL, Nair SS, Schulz DJ (2012) Rapid homeostatic plasticity of intrinsic excitability in a central  
816 pattern generator network stabilizes functional neural network output. *J Neurosci* 32:9649-  
817 9658.
- 818 Ransdell JL, Nair SS, Schulz DJ (2013) Neurons within the same network independently achieve  
819 conserved output by differentially balancing variable conductance magnitudes. *J Neurosci*  
820 33:9950-9956.
- 821 Roffman RC, Norris BJ, Calabrese RL (2012) Animal-to-animal variability of connection strength in the  
822 leech heartbeat central pattern generator. *J Neurophysiol* 107:1681-1693.
- 823 Santin JM, Schulz DJ (2019) Membrane Voltage Is a Direct Feedback Signal That Influences Correlated  
824 Ion Channel Expression in Neurons. *Curr Biol* 29:1683-1688 e1682.
- 825 Schneider AC, Fox D, Itani O, Golowasch J, Bucher D, Nadim F (2021) Frequency-Dependent Action of  
826 Neuromodulation. *eNeuro* 8.
- 827 Schulz DJ, Goillard JM, Marder E (2006) Variable channel expression in identified single and electrically  
828 coupled neurons in different animals. *Nat Neurosci* 9:356-362.
- 829 Schulz DJ, Goillard JM, Marder EE (2007) Quantitative expression profiling of identified neurons reveals  
830 cell-specific constraints on highly variable levels of gene expression. *Proc Natl Acad Sci U S A*  
831 104:13187-13191.
- 832 Somogyi P, Klausberger T (2005) Defined types of cortical interneurone structure space and spike timing  
833 in the hippocampus. *J Physiol* 562:9-26.
- 834 Soofi W, Goeritz ML, Kispersky TJ, Prinz AA, Marder E, Stein W (2014) Phase maintenance in a rhythmic  
835 motor pattern during temperature changes in vivo. *J Neurophysiol* 111:2603-2613.
- 836 Swensen AM, Bean BP (2005) Robustness of burst firing in dissociated purkinje neurons with acute or  
837 long-term reductions in sodium conductance. *J Neurosci* 25:3509-3520.
- 838 Tang LS, Taylor AL, Rinberg A, Marder E (2012) Robustness of a rhythmic circuit to short- and long-term  
839 temperature changes. *J Neurosci* 32:10075-10085.
- 840 Temporal S, Desai M, Khorkova O, Varghese G, Dai A, Schulz DJ, Golowasch J (2012) Neuromodulation  
841 independently determines correlated channel expression and conductance levels in motor  
842 neurons of the stomatogastric ganglion. *J Neurophysiol* 107:718-727.

843 Tran T, Unal CT, Severin D, Zaborszky L, Rotstein HG, Kirkwood A, Golowasch J (2019) Ionic current  
844 correlations are ubiquitous across phyla. *Sci Rep* 9:1687.  
845 Vidal-Gadea A, Topper S, Young L, Crisp A, Kressin L, Elbel E, Maples T, Brauner M, Erbguth K, Axelrod A,  
846 Gottschalk A, Siegel D, Pierce-Shimomura JT (2011) *Caenorhabditis elegans* selects distinct  
847 crawling and swimming gaits via dopamine and serotonin. *Proc Natl Acad Sci U S A* 108:17504-  
848 17509.  
849 Voolstra O, Huber A (2014) Post-Translational Modifications of TRP Channels. *Cells* 3:258-287.  
850 Wang XJ (2010) Neurophysiological and computational principles of cortical rhythms in cognition.  
851 *Physiol Rev* 90:1195-1268.  
852 Wenning A, Hill AA, Calabrese RL (2004) Heartbeat control in leeches. II. Fictive motor pattern. *J*  
853 *Neurophysiol* 91:397-409.  
854 Wenning A, Norris BJ, Gunay C, Kueh D, Calabrese RL (2018) Output variability across animals and levels  
855 in a motor system. *Elife* 7.  
856 Wilson MA, Varela C, Remondes M (2015) Phase organization of network computations. *Curr Opin*  
857 *Neurobiol* 31:250-253.  
858 Wright TM, Jr., Calabrese RL (2011a) Patterns of presynaptic activity and synaptic strength interact to  
859 produce motor output. *J Neurosci* 31:17555-17571.  
860 Wright TM, Jr., Calabrese RL (2011b) Contribution of motoneuron intrinsic properties to fictive motor  
861 pattern generation. *J Neurophysiol* 106:538-553.  
862 Zhang C, Guy RD, Mulloney B, Zhang Q, Lewis TJ (2014) Neural mechanism of optimal limb coordination  
863 in crustacean swimming. *Proc Natl Acad Sci U S A* 111:13840-13845.  
864 Zhao S, Golowasch J (2012) Ionic current correlations underlie the global tuning of large numbers of  
865 neuronal activity attributes. *J Neurosci* 32:13380-13388.  
866 Zhao S, Golowasch J, Nadim F (2010) Pacemaker neuron and network oscillations depend on a  
867 neuromodulator-regulated linear current. *Front Behav Neurosci* 4:21.  
868 Zhao S, Sheibanie AF, Oh M, Rabbah P, Nadim F (2011) Peptide neuromodulation of synaptic dynamics in  
869 an oscillatory network. *J Neurosci* 31:13991-14004.  
870

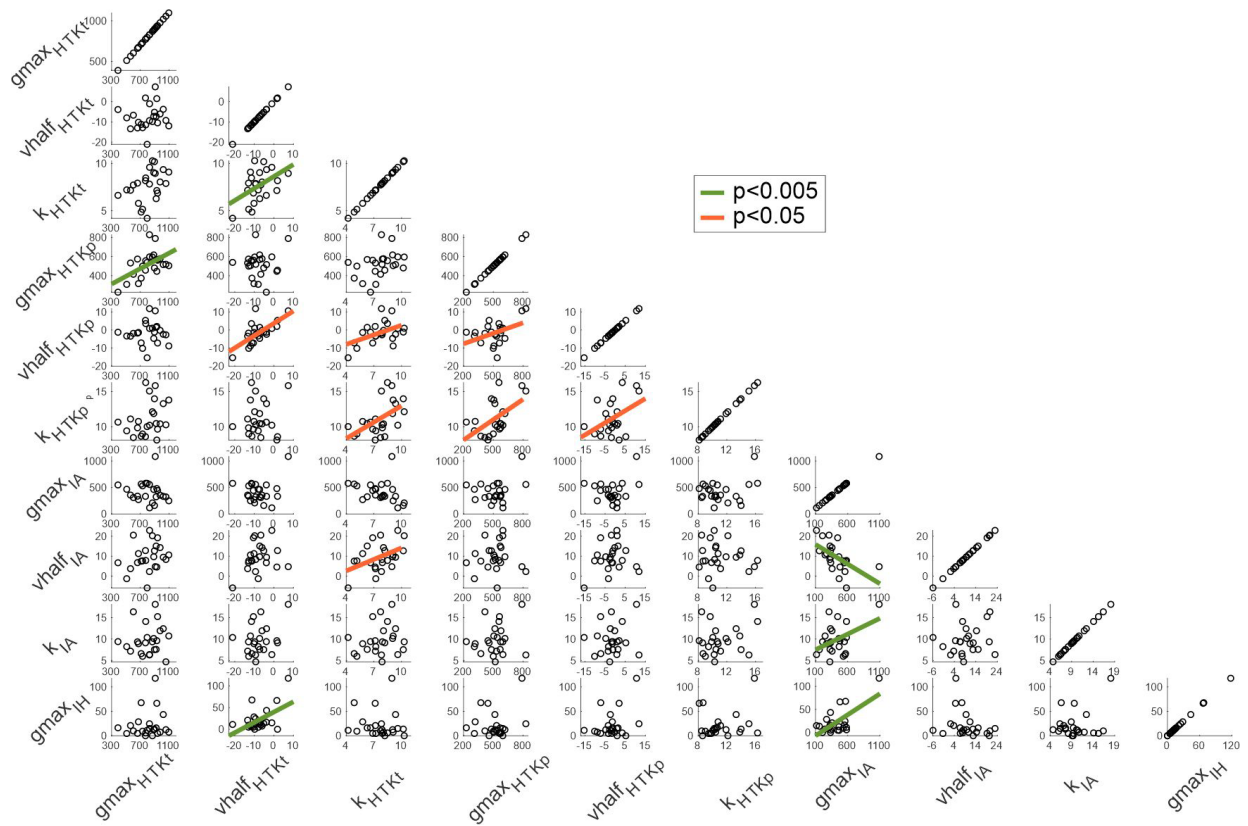

871
